# Supplementary material for: A novel variant in GLIS3 is associated with osteoarthritis
Source: PubMed Central journal article supplement (PMC5890630; doi:10.1136/annrheumdis-2017-211848), 2018-02-07

**Figure S1.** Genome-wide association study design and follow-up.

TJR, total joint replacement

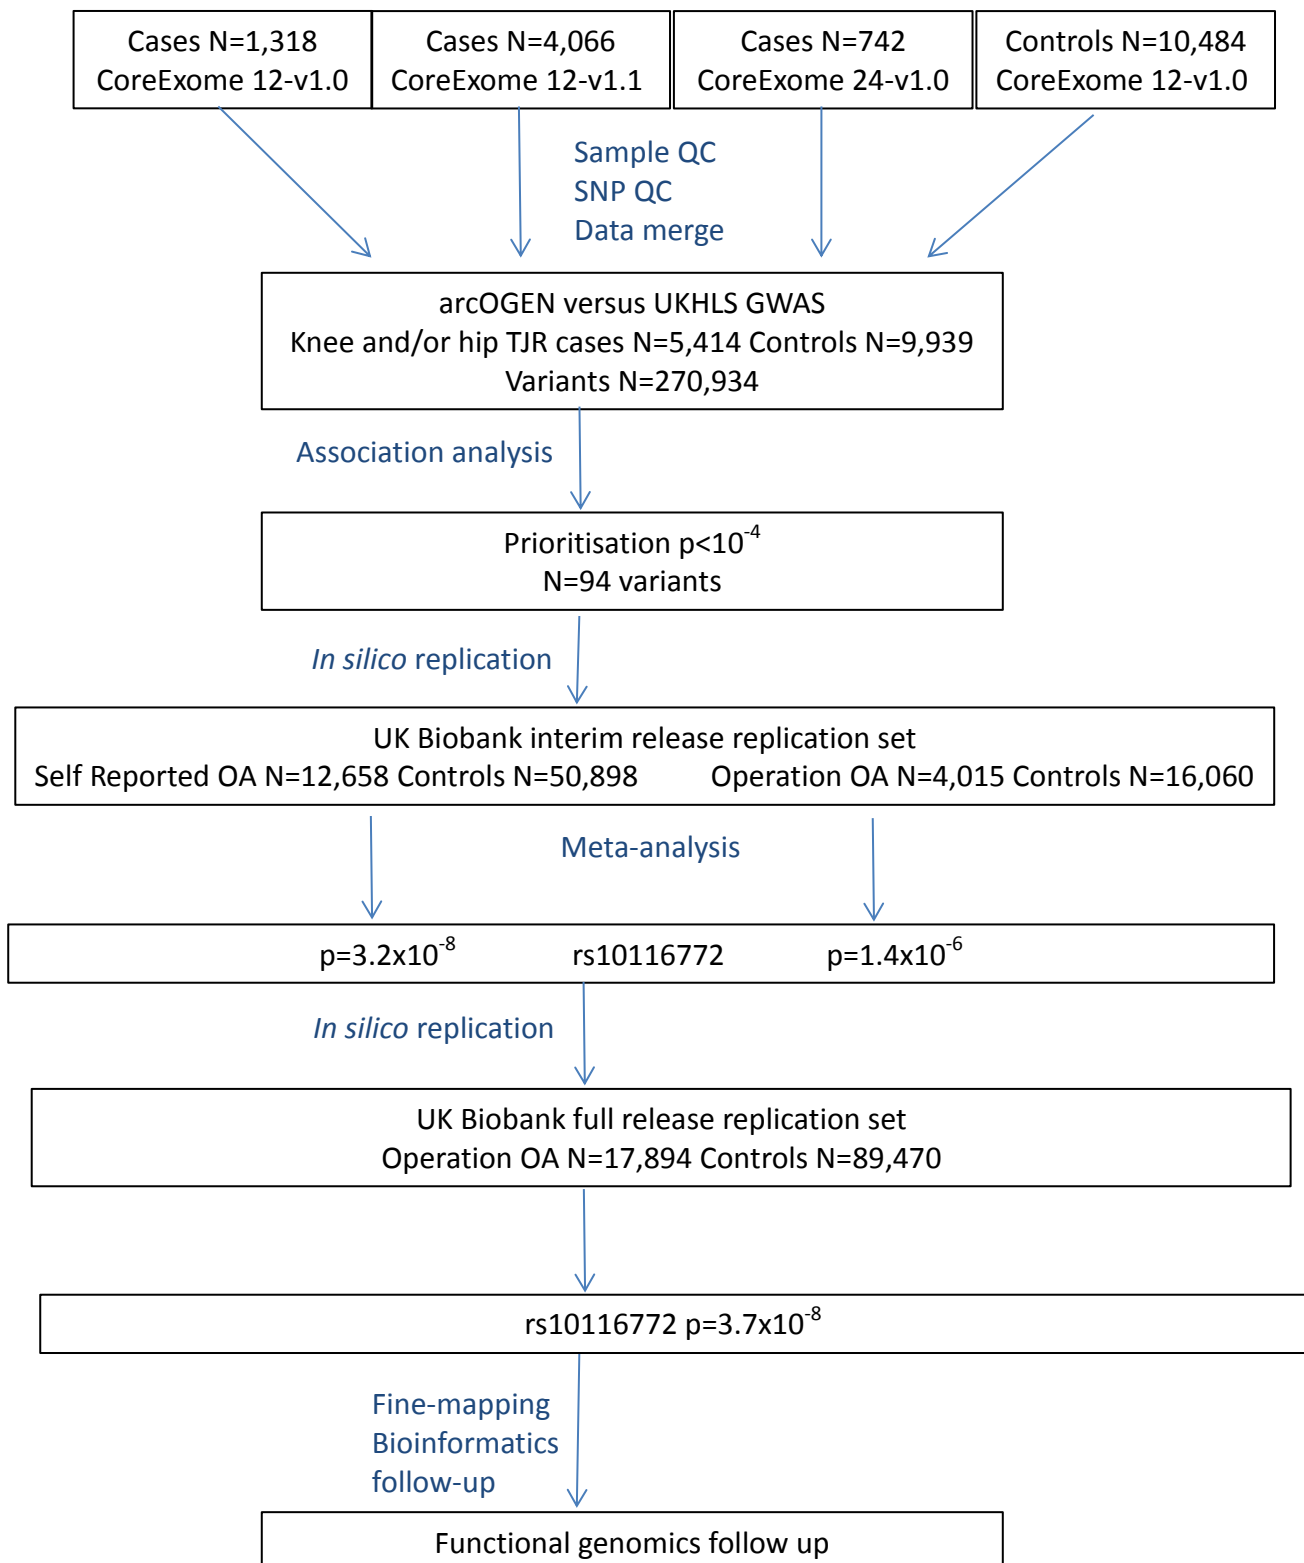

Supplement: annrheumdis-2017-211848supp002.pdf [file annrheumdis-2017-211848supp002.pdf]
