# Supplementary material for: A novel variant in GLIS3 is associated with osteoarthritis
Source: PubMed Central journal article supplement (PMC5890630; doi:10.1136/annrheumdis-2017-211848), 2018-02-07

**Figure S4.** Quantile–quantile plots of the OA cases versus controls for the three strata analysed in the discovery GWAS. (a) Knee and/or hip OA, total joint replacement cases versus controls; (b) Hip OA total joint replacement cases versus controls; (c) Knee OA total joint replacement cases versus controls.

(a)

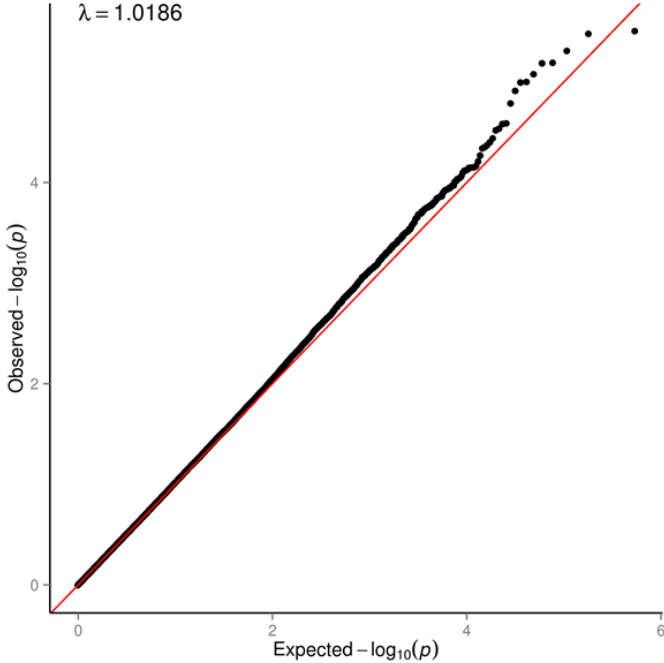

(b)

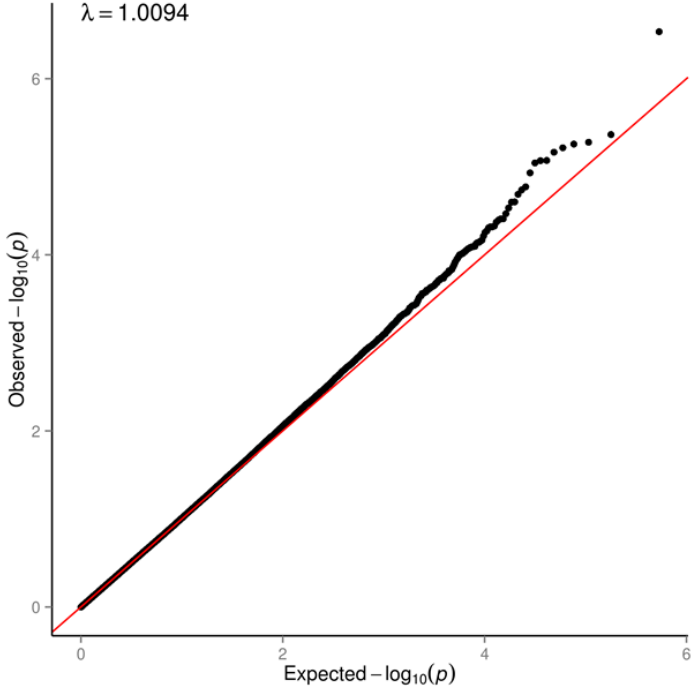

(c)

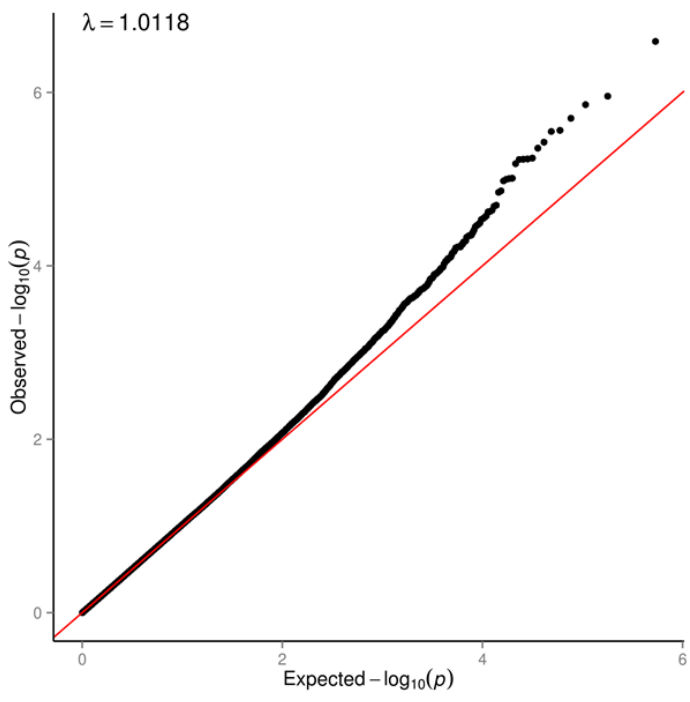

Supplement: annrheumdis-2017-211848supp008.pdf [file annrheumdis-2017-211848supp008.pdf]
