# Supplementary material for: A novel variant in GLIS3 is associated with osteoarthritis
Source: Ann Rheum Dis. 2018 Feb 7;77(4):620–3. doi: 10.1136/annrheumdis-2017-211848 (PMC5890630; doi:10.1136/annrheumdis-2017-211848)
Supplement: Supplementary file 5 [file annrheumdis-2017-211848supp005.xlsx]

## Sheet: Sheet1
Table S1. Inclusion criteria for hospital-diagnosed osteoarthritis (a), operation due to osteoarthritis (b), and exclusion criteria for controls (c) in the UK Biobank replication dataset.
OA, osteoarthritis
a. Hospital-diagnosed OA
ICD 10 code	Inclusion criteria
M150	Primary generalised (osteo)arthrosis
M151	Heberden's nodes (with arthropathy)
M152	Bouchard's nodes (with arthropathy)
M1599	Polyosteoarthritis, unspecified
M16	Coxarthrosis [arthrosis of hip]
M160	Primary coxarthrosis, bilateral
M161	Other primary coxarthrosis
M169	Coxarthrosis, unspecified
M17	Gonarthrosis [arthrosis of knee]
M170	Primary gonarthrosis, bilateral
M171	Other primary gonarthrosis
M179	Gonarthrosis, unspecified
M18	Arthrosis of first carpometacarpal joint
M180	Primary arthrosis of first carpometacarpal joints, bilateral
M181	Other primary arthrosis of first carpometacarpal joint
M189	Arthrosis of first carpometacarpal joint, unspecified
M19	Other arthrosis
M190	Primary arthrosis of other joints
M1900	Primary arthrosis of other joints (Multiple sites)
M1901	Primary arthrosis of other joints (Shoulder region)
M1902	Primary arthrosis of other joints (Upper arm)
M1903	Primary arthrosis of other joints (Forearm)
M1904	Primary arthrosis of other joints (Hand)
M1905	Primary arthrosis of other joints (Pelvic region and thigh)
M1906	Primary arthrosis of other joints-Lower leg
M1907	Primary arthrosis of other joints (Ankle and foot)
M1908	Primary arthrosis of other joints (Other)
M1909	Primary arthrosis of other joints (Site unspecified)
M199	Arthrosis, unspecified
M1990	Arthrosis, unspecified (Multiple sites)
M1991	Arthrosis, unspecified (Shoulder region)
M1992	Arthrosis, unspecified (Upper arm)
M1993	Arthrosis, unspecified (Forearm)
M1994	Arthrosis, unspecified (Hand)
M1995	Arthrosis, unspecified (Pelvic region and thigh)
M1996	Arthrosis, unspecified-Lower leg
M1997	Arthrosis, unspecified (Ankle and foot)
M1998	Arthrosis, unspecified (Other)
M1999	Arthrosis, unspecified (Site unspecified)
M472	Other spondylosis with radiculopathy
M4720	Other spondylosis with radiculopathy (Multiple sites in spine)
M4721	Other spondylosis with radiculopathy (Occipito-atlanto-axial region)
M4722	Other spondylosis with radiculopathy (Cervical region)
M4723	Other spondylosis with radiculopathy (Cervicothoracic region)
M4724	Other spondylosis with radiculopathy (Thoracic region)
M4725	Other spondylosis with radiculopathy (Thoracolumbar region)
M4726	Other spondylosis with radiculopathy (Lumbar region)
M4727	Other spondylosis with radiculopathy (Lumbosacral region)
M4728	Other spondylosis with radiculopathy (Sacral and sacrococcygeal region)
M4729	Other spondylosis with radiculopathy (Site unspecified)
M478	Other spondylosis
M4780	Other spondylosis (Multiple sites in spine)
M4781	Other spondylosis (Occipito-atlanto-axial region)
M4782	Other spondylosis (Cervical region)
M4783	Other spondylosis (Cervicothoracic region)
M4784	Other spondylosis (Thoracic region)
M4785	Other spondylosis (Thoracolumbar region)
M4786	Other spondylosis (Lumbar region)
M4787	Other spondylosis (Lumbosacral region)
M4788	Other spondylosis (Sacral and sacrococcygeal region)
M4789	Other spondylosis (Site unspecified)
M479	Spondylosis, unspecified
M4790	Spondylosis, unspecified (Multiple sites in spine)
M4791	Spondylosis, unspecified (Occipito-atlanto-axial region)
M4792	Spondylosis, unspecified (Cervical region)
M4793	Spondylosis, unspecified (Cervicothoracic region)
M4794	Spondylosis, unspecified (Thoracic region)
M4795	Spondylosis, unspecified (Thoracolumbar region)
M4796	Spondylosis, unspecified (Lumbar region)
M4797	Spondylosis, unspecified (Lumbosacral region)
M4798	Spondylosis, unspecified (Sacral and sacrococcygeal region)
ICD 9 code	Inclusion criteria
7153	Unspecified localised osteoarthritis and allied disorders
71530	Unspec. localised osteoarthrosis/allied dis. (multiple sites)
71531	Unspec. localised osteoarthrosis/allied dis. (shoulder region)
71532	Unspec. localised osteoarthrosis/allied dis. (upper arm)
71533	Unspec. localised osteoarthrosis/allied dis. (forearm)
71534	Unspec. localised osteoarthrosis/allied dis. (hand)
71535	Unspec. localised osteoarthrosis/allied dis. (pelvic region and thigh)
71536	Unspec. localised osteoarthrosis/allied dis. (lower leg)
71537	Unspec. localised osteoarthrosis/allied dis. (ankle and foot)
71538	Unspec. localised osteoarthrosis/allied dis. (other specified site)
71539	Unspec. localised osteoarthrosis/allied dis. (unspecified site)
7158	Osteoarthrosis/allied dis. more than one site but not generalized
7159	Osteoarthrosis/allied dis. not spec. whether gen. or loc.
715	Osteoarthrosis and allied disorders
7150	Generalized osteoarthrosis and allied disorders
7151	Localised, primary osteoarthrosis and allied disorders
71510	Localised, primary osteoarthrosis and allied disorders (multiple sites)
71511	Localised, primary osteoarthrosis and allied disorders (shoulder region)
71512	Localised, primary osteoarthrosis and allied disorders (upper arm)
71513	Localised, primary osteoarthrosis and allied disorders (forearm)
71514	Localised, primary osteoarthrosis and allied disorders (hand)
71515	Localised prim. osteoarthrosis/allied dis. (pelvic region and thigh)
71516	Localised, primary osteoarthrosis and allied disorders (lower leg)
71517	Localised, primary osteoarthrosis and allied disorders (ankle and foot)
71518	Localised, prim. osteoarthrosis/allied dis. (other specified site)
71519	Localised, primary osteoarthrosis and allied disorders (site unspecified)
7210	Cervical spondylosis without myelopathy
7219	Spondylosis of unspecified site
7212	Thoracic spondylosis without myelopathy
7213	Lumbosacral spondylosis without myelopathy
Hospital-diagnosed hip OA
ICD 10 code	Inclusion criteria
M16	Coxarthrosis [arthrosis of hip]
M160	Primary coxarthrosis, bilateral
M161	Other primary coxarthrosis
M169	Coxarthrosis, unspecified
M1905	Primary arthrosis of other joints (Pelvic region and thigh)
M1995	Arthrosis, unspecified (Pelvic region and thigh)
ICD 9 code	Inclusion criteria
71535	Unspec. localised osteoarthrosis/allied dis. (pelvic region and thigh)
71515	Localised prim. osteoarthrosis/allied dis. (pelvic region and thigh)
Hospital-diagnosed knee OA
ICD 10 code	Inclusion criteria
M17	Gonarthrosis [arthrosis of knee]
M170	Primary gonarthrosis, bilateral
M171	Other primary gonarthrosis
M179	Gonarthrosis, unspecified
M1906	Primary arthrosis of other joints-Lower leg
M1996	Arthrosis, unspecified-Lower leg
ICD 9 code	Inclusion criteria
71536	Unspec. localised osteoarthrosis/allied dis. (lower leg)
71516	Localised, primary osteoarthrosis and allied disorders (lower leg)
Hospital-diagnosed hip and/or knee OA
ICD 10 code	Inclusion criteria
M16	Coxarthrosis [arthrosis of hip]
M160	Primary coxarthrosis, bilateral
M161	Other primary coxarthrosis
M169	Coxarthrosis, unspecified
M1905	Primary arthrosis of other joints (Pelvic region and thigh)
M1995	Arthrosis, unspecified (Pelvic region and thigh)
M17	Gonarthrosis [arthrosis of knee]
M170	Primary gonarthrosis, bilateral
M171	Other primary gonarthrosis
M179	Gonarthrosis, unspecified
M1906	Primary arthrosis of other joints-Lower leg
M1996	Arthrosis, unspecified-Lower leg
ICD 9 code	Inclusion criteria
71535	Unspec. localised osteoarthrosis/allied dis. (pelvic region and thigh)
71515	Localised prim. osteoarthrosis/allied dis. (pelvic region and thigh)
71536	Unspec. localised osteoarthrosis/allied dis. (lower leg)
71516	Localised, primary osteoarthrosis and allied disorders (lower leg)
b. Operation knee OA
OPCS4 operation code	Inclusion criteria
O18	Hybrid prosthetic replacement of knee joint using cement
O180	Conversion from previous hybrid prosthetic replacement of knee joint using cement
O181	Primary hybrid prosthetic replacement of knee joint using cement
O182	Conversion to hybrid prosthetic replacement of knee joint using cement
O183	Revision of hybrid prosthetic replacement of knee joint using cement
O184	Attention to hybrid prosthetic replacement of knee joint using cement
O188	Other specified hybrid prosthetic replacement of knee joint using cement
O189	Unspecified hybrid prosthetic replacement of knee joint using cement
W40	Total prosthetic replacement of knee joint using cement
W400	Conversion from previous cemented total prosthetic replacement of knee joint
W401	Primary total prosthetic replacement of knee joint using cement
W402	Conversion to total prosthetic replacement of knee joint using cement
W403	Revision of total prosthetic replacement of knee joint using cement
W404	Revision of one component of total prosthetic replacement of knee joint using cement
W408	Other specified total prosthetic replacement of knee joint using cement
W409	Unspecified total prosthetic replacement of knee joint using cement
W41	Total prosthetic replacement of knee joint not using cement
W410	Conversion from previous uncemented total prosthetic replacement of knee joint
W411	Primary total prosthetic replacement of knee joint not using cement
W412	Conversion to total prosthetic replacement of knee joint not using cement
W413	Revision of total prosthetic replacement of knee joint not using cement
W414	Revision of one component of total prosthetic replacement of knee joint not using cement
W418	Other specified total prosthetic replacement of knee joint not using cement
W419	Unspecified total prosthetic replacement of knee joint not using cement
W42	Other total prosthetic replacement of knee joint
W420	Conversion from previous total prosthetic replacement of knee joint NEC
W421	Primary total prosthetic replacement of knee joint NEC
W422	Conversion to total prosthetic replacement of knee joint NEC
W423	Revision of total prosthetic replacement of knee joint NEC
W424	Attention to total prosthetic replacement of knee joint NEC
and	and
Y032	Renewal of prosthesis in organ NOC
or	or
Y037	Removal of prosthesis from organ NOC
W425	Revision of one component of total prosthetic replacement of knee joint NEC
W426	Arthrolysis of total prosthetic replacement of knee joint
W428	Other specified other total prosthetic replacement of knee joint
W429	Unspecified other total prosthetic replacement of knee joint
W52	Prosthetic replacement of articulation of other bone using cement
W520	Conversion from previous cemented prosthetic replacement of articulation of bone NEC
W521	Primary prosthetic replacement of articulation of bone using cement NEC
W522	Conversion to prosthetic replacement of articulation of bone using cement NEC
W523	Revision of prosthetic replacement of articulation of bone using cement NEC
W528	Other specified prosthetic replacement of articulation of other bone using cement
W529	Unspecified prosthetic replacement of articulation of other bone using cement
W53	Prosthetic replacement of articulation of other bone not using cement
W530	Conversion from previous uncemented prosthetic replacement of articulation of bone NEC
W531	Primary prosthetic replacement of articulation of bone not using cement NEC
W532	Conversion to prosthetic replacement of articulation of bone not using cement NEC
W533	Revision of prosthetic replacement of articulation of bone not using cement NEC
W538	Other specified prosthetic replacement of articulation of other bone not using cement
W539	Unspecified prosthetic replacement of articulation of other bone not using cement
W54	Other prosthetic replacement of articulation of other bone
W540	Conversion from previous prosthetic replacement of articulation of bone NEC
W541	Primary prosthetic replacement of articulation of bone NEC
W542	Conversion to prosthetic replacement of articulation of bone NEC
W543	Revision of prosthetic replacement of articulation of bone NEC
W544	Attention to prosthetic replacement of articulation of bone NEC
and	and
Y032	Renewal of prosthesis in organ NOC
or	or
Y037	Removal of prosthesis from organ NOC
W548	Other specified other prosthetic replacement of articulation of other bone
W549	Unspecified other prosthetic replacement of articulation of other bone
W58	Other reconstruction of joint
W580	Conversion from previous resurfacing arthroplasty of joint
W581	Primary resurfacing arthroplasty of joint
W582	Revision of resurfacing arthroplasty of joint
W588	Other specified other reconstruction of joint
W589	Unspecified other reconstruction of joint
W063	Total excision of patella
W553	Conversion to prosthetic interposition arthroplasty of joint
W564	Conversion to interposition arthroplasty of joint NEC
W574	Conversion to excision arthroplasty of joint
W603	Conversion to arthrodesis and extra-articular bone graft NEC
W613	Conversion to arthrodesis and articular bone graft NEC
W641	Conversion to arthrodesis and internal fixation NEC
W642	Conversion to arthrodesis and external fixation NEC
Operation hip OA
OPCS4 operation codes	Inclusion criteria - knee OA
W37	Total prosthetic replacement of hip joint using cement
W370	Conversion from previous cemented total prosthetic replacement of hip joint
W371	Primary total prosthetic replacement of hip joint using cement
W372	Conversion to total prosthetic replacement of hip joint using cement
W373	Revision of total prosthetic replacement of hip joint using cement
W374	Revision of one component of total prosthetic replacement of hip joint using cement
W378	Other specified total prosthetic replacement of hip joint using cement
W379	Unspecified total prosthetic replacement of hip joint using cement
W38	Total prosthetic replacement of hip joint not using cement
W380	Conversion from previous uncemented total prosthetic replacement of hip joint
W381	Primary total prosthetic replacement of hip joint not using cement
W382	Conversion to total prosthetic replacement of hip joint not using cement
W383	Revision of total prosthetic replacement of hip joint not using cement
W384	Revision of one component of total prosthetic replacement of hip joint not using cement
W388	Other specified total prosthetic replacement of hip joint not using cement
W389	Unspecified total prosthetic replacement of hip joint not using cement
W39	Other total prosthetic replacement of hip joint
W390	Conversion from previous total prosthetic replacement of hip joint NEC
W391	Primary total prosthetic replacement of hip joint NEC
W392	Conversion to total prosthetic replacement of hip joint NEC
W393	Revision of total prosthetic replacement of hip joint NEC
W394	Attention to total prosthetic replacement of hip joint NEC
and	and
Y032	Renewal of prosthesis in organ NOC
or	or
Y037	Removal of prosthesis from organ NOC
W395	Revision of one component of total prosthetic replacement of hip joint NEC
W396	Closed reduction of dislocated total prosthetic replacement of hip joint
W398	Other specified other total prosthetic replacement of hip joint
W399	Unspecified other total prosthetic replacement of hip joint
W521	Primary prosthetic replacement of articulation of bone using cement NEC
W531	Primary prosthetic replacement of articulation of bone not using cement NEC
W541	Primary prosthetic replacement of articulation of bone NEC
W462	Conversion to prosthetic replacement of head of femur using cement
W472	Conversion to prosthetic replacement of head of femur not using cement
W482	Conversion to prosthetic replacement of head of femur NEC
W93	Hybrid prosthetic replacement of hip joint using cemented acetabular component
W930	Conversion from previous hybrid prosthetic replacement of hip joint using cemented acetabular component
W931	Primary hybrid prosthetic replacement of hip joint using cemented acetabular component
W932	Conversion to hybrid prosthetic replacement of hip joint using cemented acetabular component
W933	Revision of hybrid prosthetic replacement of hip joint using cemented acetabular component
W938	Other specified hybrid prosthetic replacement of hip joint using cemented acetabular component
W939	Unspecified hybrid prosthetic replacement of hip joint using cemented acetabular component
W94	Hybrid prosthetic replacement of hip joint using cemented femoral component
W940	Conversion from previous hybrid prosthetic replacement of hip joint using cemented femoral component
W941	Primary hybrid prosthetic replacement of hip joint using cemented femoral component
W942	Conversion to hybrid prosthetic replacement of hip joint using cemented femoral component
W943	Revision of hybrid prosthetic replacement of hip joint using cemented femoral component
W948	Other specified hybrid prosthetic replacement of hip joint using cemented femoral component
W949	Unspecified hybrid prosthetic replacement of hip joint using cemented femoral component
W95	Hybrid prosthetic replacement of hip joint using cement
W950	Conversion from previous hybrid prosthetic replacement of hip joint using cement NEC
W951	Primary hybrid prosthetic replacement of hip joint using cement NEC
W952	Conversion to hybrid prosthetic replacement of hip joint using cement NEC
W953	Revision of hybrid prosthetic replacement of hip joint using cement NEC
W954	Attention to hybrid prosthetic replacement of hip joint using cement NEC
W958	Other specified hybrid prosthetic replacement of hip joint using cement
W959	Unspecified hybrid prosthetic replacement of hip joint using cement
W522	Conversion to prosthetic replacement of articulation of bone using cement NEC
W523	Revision of prosthetic replacement of articulation of bone using cement NEC
W532	Conversion to prosthetic replacement of articulation of bone not using cement NEC
W533	Revision of prosthetic replacement of articulation of bone not using cement NEC
W542	Conversion to prosthetic replacement of articulation of bone NEC
W543	Revision of prosthetic replacement of articulation of bone NEC
W544	Attention to prosthetic replacement of articulation of bone NEC
and	and
Y032	Renewal of prosthesis in organ NOC
or	or
Y037	Removal of prosthesis from organ NOC
W58	Other reconstruction of joint
W580	Conversion from previous resurfacing arthroplasty of joint
W581	Primary resurfacing arthroplasty of joint
W582	Revision of resurfacing arthroplasty of joint
W588	Other specified other reconstruction of joint
W589	Unspecified other reconstruction of joint
c. Controls non-OA
ICD 10 code	Exclusion criteria
M111	Familial chondrocalcinosis
M1110	Familial chondrocalcinosis (Multiple sites)
M1111	Familial chondrocalcinosis (Shoulder region)
M1112	Familial chondrocalcinosis (Upper arm)
M1113	Familial chondrocalcinosis (Forearm)
M1114	Familial chondrocalcinosis (Hand)
M1115	Familial chondrocalcinosis (Pelvic region and thigh)
M1116	Familial chondrocalcinosis (Lower leg)
M1117	Familial chondrocalcinosis (Ankle and foot)
M1118	Familial chondrocalcinosis (Other)
M1119	Familial chondrocalcinosis (Site unspecified)
M112	Other chondrocalcinosis
M1120	Other chondrocalcinosis (Multiple sites)
M1121	Other chondrocalcinosis (Shoulder region)
M1122	Other chondrocalcinosis (Upper arm)
M1123	Other chondrocalcinosis (Forearm)
M1124	Other chondrocalcinosis (Hand)
M1125	Other chondrocalcinosis (Pelvic region and thigh)
M1126	Other chondrocalcinosis (Lower leg)
M1127	Other chondrocalcinosis (Ankle and foot)
M1128	Other chondrocalcinosis (Other)
M1129	Other chondrocalcinosis (Site unspecified)
M118	Other specified crystal arthropathies
M1180	Other specified crystal arthropathies (Multiple sites)
M1181	Other specified crystal arthropathies (Shoulder region)
M1182	Other specified crystal arthropathies (Upper arm)
M1183	Other specified crystal arthropathies (Forearm)
M1184	Other specified crystal arthropathies (Hand)
M1185	Other specified crystal arthropathies (Pelvic region and thigh)
M1186	Other specified crystal arthropathies (Lower leg)
M1187	Other specified crystal arthropathies (Ankle and foot)
M1188	Other specified crystal arthropathies (Other)
M1189	Other specified crystal arthropathies (Site unspecified)
M119	Crystal arthropathy, unspecified
M1190	Crystal arthropathy, unspecified (Multiple sites)
M1191	Crystal arthropathy, unspecified (Shoulder region)
M1192	Crystal arthropathy, unspecified (Upper arm)
M1193	Crystal arthropathy, unspecified (Forearm)
M1194	Crystal arthropathy, unspecified (Hand)
M1195	Crystal arthropathy, unspecified (Pelvic region and thigh)
M1196	Crystal arthropathy, unspecified (Lower leg)
M1197	Crystal arthropathy, unspecified (Ankle and foot)
M1198	Crystal arthropathy, unspecified (Other)
M1199	Crystal arthropathy, unspecified (Site unspecified)
M13	Other arthritis
M130	Polyarthritis, unspecified
M1300	Polyarthritis, unspecified (Multiple sites)
M1305	Polyarthritis, unspecified (Pelvic region and thigh)
M1306	Polyarthritis, unspecified (Lower leg)
M1309	Polyarthritis, unspecified (Site unspecified)
M131	Monoarthritis, not elsewhere classified
M1310	Monoarthritis, not elsewhere classified (Multiple sites)
M1314	Monoarthritis, not elsewhere classified (Hand)
M1315	Monoarthritis, not elsewhere classified (Pelvic region and thigh)
M1316	Monoarthritis, not elsewhere classified (Lower leg)
M1319	Monoarthritis, not elsewhere classified (Site unspecified)
M138	Other specified arthritis
M1380	Other specified arthritis (Multiple sites)
M1384	Other specified arthritis (Hand)
M1385	Other specified arthritis (Pelvic region and thigh)
M1386	Other specified arthritis (Lower leg)
M1389	Other specified arthritis (Site unspecified)
M139	Arthritis, unspecified
M1390	Arthritis, unspecified (Multiple sites)
M1394	Arthritis, unspecified (Hand)
M1395	Arthritis, unspecified (Pelvic region and thigh)
M1396	Arthritis, unspecified (Lower leg)
M1399	Arthritis, unspecified (Site unspecified)
M15	Polyarthrosis
M150	Primary generalised (osteo)arthrosis
M151	Heberden's nodes (with arthropathy)
M152	Bouchard's nodes (with arthropathy)
M153	Secondary multiple arthrosis
M154	Erosive (osteo)arthrosis
M158	Other polyarthrosis
M159	Polyarthrosis, unspecified
M1599	Polyosteoarthritis, unspecified
M16	Coxarthrosis [arthrosis of hip]
M160	Primary coxarthrosis, bilateral
M161	Other primary coxarthrosis
M162	Coxarthrosis resulting from dysplasia, bilateral
M163	Other dysplastic coxarthrosis
M164	Posttraumatic coxarthrosis, bilateral
M165	Other posttraumatic coxarthrosis
M166	Other secondary coxarthrosis, bilateral
M167	Other secondary coxarthrosis
M169	Coxarthrosis, unspecified
M17	Gonarthrosis [arthrosis of knee]
M170	Primary gonarthrosis, bilateral
M171	Other primary gonarthrosis
M172	Posttraumatic gonarthrosis, bilateral
M173	Other posttraumatic gonarthrosis
M174	Other secondary gonarthrosis, bilateral
M175	Other secondary gonarthrosis
M179	Gonarthrosis, unspecified
M18	Arthrosis of first carpometacarpal joint
M180	Primary arthrosis of first carpometacarpal joints, bilateral
M181	Other primary arthrosis of first carpometacarpal joint
M182	Posttraumatic arthrosis of first carpometacarpal joints, bilateral
M183	Other posttraumatic arthrosis of first carpometacarpal joint
M184	Other secondary arthrosis of first carpometacarpal joints, bilateral
M185	Other secondary arthrosis of first carpometacarpal joint
M189	Arthrosis of first carpometacarpal joint, unspecified
M19	Other arthrosis
M190	Primary arthrosis of other joints
M1900	Primary arthrosis of other joints (Multiple sites)
M1901	Primary arthrosis of other joints (Shoulder region)
M1902	Primary arthrosis of other joints (Upper arm)
M1903	Primary arthrosis of other joints (Forearm)
M1904	Primary arthrosis of other joints (Hand)
M1905	Primary arthrosis of other joints (Pelvic region and thigh)
M1906	Primary arthrosis of other joints-Lower leg
M1907	Primary arthrosis of other joints (Ankle and foot)
M1908	Primary arthrosis of other joints (Other)
M1909	Primary arthrosis of other joints (Site unspecified)
M191	Posttraumatic arthrosis of other joints
M1910	Post-traumatic arthrosis of other joints (Multiple sites)
M1911	Post-traumatic arthrosis of other joints (Shoulder region)
M1912	Post-traumatic arthrosis of other joints (Upper arm)
M1913	Post-traumatic arthrosis of other joints (Forearm)
M1914	Post-traumatic arthrosis of other joints (Hand)
M1915	Post-traumatic arthrosis of other joints (Pelvic region and thigh)
M1916	Post-traumatic arthrosis of other joints-Lower leg
M1917	Post-traumatic arthrosis of other joints (Ankle and foot)
M1918	Post-traumatic arthrosis of other joints (Other)
M1919	Post-traumatic arthrosis of other joints (Site unspecified)
M192	Other secondary arthrosis
M1920	Other secondary arthrosis (Multiple sites)
M1921	Other secondary arthrosis (Shoulder region)
M1922	Other secondary arthrosis (Upper arm)
M1923	Other secondary arthrosis (Forearm)
M1924	Other secondary arthrosis (Hand)
M1925	Other secondary arthrosis (Pelvic region and thigh)
M1926	Other secondary arthrosis of other joints-Lower leg
M1927	Other secondary arthrosis (Ankle and foot)
M1928	Other secondary arthrosis (Other)
M1929	Other secondary arthrosis (Site unspecified)
M198	Other specified arthrosis
M1980	Other specified arthrosis (Multiple sites)
M1981	Other specified arthrosis (Shoulder region)
M1982	Other specified arthrosis (Upper arm)
M1983	Other specified arthrosis (Forearm)
M1984	Other specified arthrosis (Hand)
M1985	Other specified arthrosis (Pelvic region and thigh)
M1986	Other specified arthrosis (Lower leg)
M1987	Other specified arthrosis (Ankle and foot)
M1988	Other specified arthrosis (Other)
M1989	Other specified arthrosis (Site unspecified)
M199	Arthrosis, unspecified
M1990	Arthrosis, unspecified (Multiple sites)
M1991	Arthrosis, unspecified (Shoulder region)
M1992	Arthrosis, unspecified (Upper arm)
M1993	Arthrosis, unspecified (Forearm)
M1994	Arthrosis, unspecified (Hand)
M1995	Arthrosis, unspecified (Pelvic region and thigh)
M1996	Arthrosis, unspecified-Lower leg
M1997	Arthrosis, unspecified (Ankle and foot)
M1998	Arthrosis, unspecified (Other)
M1999	Arthrosis, unspecified (Site unspecified)
M20	Acquired deformities of fingers and toes
M200	Deformity of finger(s)
M21	Other acquired deformities of limbs
M210	Valgus deformity, not elsewhere classified
M2100	Valgus deformity, not elsewhere classified (Multiple sites)
M2105	Valgus deformity, not elsewhere classified (Pelvic region and thigh)
M2106	Valgus deformity, not elsewhere classified (Lower leg)
M2109	Valgus deformity, not elsewhere classified (Site unspecified)
M211	Varus deformity, not elsewhere classified
M2110	Varus deformity, not elsewhere classified (Multiple sites)
M2115	Varus deformity, not elsewhere classified (Pelvic region and thigh)
M2116	Varus deformity, not elsewhere classified (Lower leg)
M2119	Varus deformity, not elsewhere classified (Site unspecified)
M212	Flexion deformity
M2120	Flexion deformity (Multiple sites)
M2124	Flexion deformity (Hand)
M2125	Flexion deformity (Pelvic region and thigh)
M2126	Flexion deformity (Lower leg)
M2129	Flexion deformity (Site unspecified)
M22	Disorders of patella
M220	Recurrent dislocation of patella
M221	Recurrent subluxation of patella
M222	Patellofemoral disorders
M223	Other derangements of patella
M224	Chondromalacia patellae
M228	Other disorders of patella
M229	Disorder of patella, unspecified
M23	Internal derangement of knee
M230	Cystic meniscus
M2300	Cystic meniscus (Multiple sites)
M2301	Cystic meniscus (Anterior cruciate ligament or Anterior horn of medial meniscus)
M2302	Cystic meniscus (Posterior cruciate ligament or Posterior horn of medial meniscus)
M2303	Cystic meniscus (Medial collateral ligament or Other and unspecified medial meniscus)
M2304	Cystic meniscus (Lateral collateral ligament or Anterior horn of lateral meniscus)
M2305	Cystic meniscus (Posterior horn of lateral meniscus)
M2306	Cystic meniscus (Other and unspecified lateral meniscus)
M2307	Cystic meniscus-Capsular lig
M2309	Cystic meniscus (Unspecified ligament or Unspecified meniscus)
M231	Discoid meniscus (congenital)
M2310	Discoid meniscus (congenital) (Multiple sites)
M2311	Discoid meniscus (congenital) (Anterior cruciate ligament or Anterior horn of medial meniscus)
M2312	Discoid meniscus (congenital) (Posterior cruciate ligament or Posterior horn of medial meniscus)
M2313	Discoid meniscus (congenital) (Medial collateral ligament or Other and unspecified medial meniscus)
M2314	Discoid meniscus (congenital) (Lateral collateral ligament or Anterior horn of lateral meniscus)
M2315	Discoid meniscus (congenital) (Posterior horn of lateral meniscus)
M2316	Discoid meniscus (congenital) (Other and unspecified lateral meniscus)
M2317	Discoid meniscus (congenital)-Capsular lig
M2319	Discoid meniscus (congenital) (Unspecified ligament or Unspecified meniscus)
M232	Derangement of meniscus due to old tear or injury
M2320	Derangement of meniscus due to old tear or injury (Multiple sites)
M2321	Derangement of meniscus due to old tear or injury (Anterior cruciate ligament or Anterior horn of medial meniscus)
M2322	Derangement of meniscus due to old tear or injury (Posterior cruciate ligament or Posterior horn of medial meniscus)
M2323	Derangement of meniscus due to old tear or injury (Medial collateral ligament or Other and unspecified medial meniscus)
M2324	Derangement of meniscus due to old tear or injury (Lateral collateral ligament or Anterior horn of lateral meniscus)
M2325	Derangement of meniscus due to old tear or injury (Posterior horn of lateral meniscus)
M2326	Derangement of meniscus due to old tear or injury (Other and unspecified lateral meniscus)
M2327	Derangement of meniscus due to old tear or injury-Capsular
M2329	Derangement of meniscus due to old tear or injury (Unspecified ligament or Unspecified meniscus)
M233	Other meniscus derangements
M2330	Other meniscus derangements (Multiple sites)
M2331	Other meniscus derangements (Anterior cruciate ligament or Anterior horn of medial meniscus)
M2332	Other meniscus derangements (Posterior cruciate ligament or Posterior horn of medial meniscus)
M2333	Other meniscus derangements (Medial collateral ligament or Other and unspecified medial meniscus)
M2334	Other meniscus derangements (Lateral collateral ligament or Anterior horn of lateral meniscus)
M2335	Other meniscus derangements (Posterior horn of lateral meniscus)
M2336	Other meniscus derangements (Other and unspecified lateral meniscus)
M2337	Other meniscus derangements-Capsular lig
M2339	Other meniscus derangements (Unspecified ligament or Unspecified meniscus)
M234	Loose body in knee
M2340	Loose body in knee-Mult sites
M2341	Loose body in knee-Ant lig/hrn men
M2342	Loose body in knee-Pst lig/hrn men
M2343	Loose body in knee-Med lig/oth men
M2344	Loose body in knee-Lat lig/ant men
M2345	Loose body in knee-Pst hrn lat men
M2346	Loose body in knee-O/unsp lat men
M2347	Loose body in knee-Capsular lig
M2349	Loose body in knee-Unspec lig/men
M235	Chronic instability of knee
M2350	Chronic instability of knee (Multiple sites)
M2351	Chronic instability of knee (Anterior cruciate ligament or Anterior horn of medial meniscus)
M2352	Chronic instability of knee (Posterior cruciate ligament or Posterior horn of medial meniscus)
M2353	Chronic instability of knee (Medial collateral ligament or Other and unspecified medial meniscus)
M2354	Chronic instability of knee (Lateral collateral ligament or Anterior horn of lateral meniscus)
M2355	Chronic instability of knee (Posterior horn of lateral meniscus)
M2356	Chronic instability of knee (Other and unspecified lateral meniscus)
M2357	Chronic instability of knee (Capsular ligament)
M2359	Chronic instability of knee (Unspecified ligament or Unspecified meniscus)
M236	Other spontaneous disruption of ligament(s) of knee
M2360	Other spontaneous disruption of ligament(s) of knee (Multiple sites)
M2361	Other spontaneous disruption of ligament(s) of knee (Anterior cruciate ligament or Anterior horn of medial meniscus)
M2362	Other spontaneous disruption of ligament(s) of knee (Posterior cruciate ligament or Posterior horn of medial meniscus)
M2363	Other spontaneous disruption of ligament(s) of knee (Medial collateral ligament or Other and unspecified medial meniscus)
M2364	Other spontaneous disruption of ligament(s) of knee (Lateral collateral ligament or Anterior horn of lateral meniscus)
M2365	Other spontaneous disruption of ligament(s) of knee-Pst hrn
M2366	Other spontaneous disruption of ligament(s) of knee-O/unsp
M2367	Other spontaneous disruption of ligament(s) of knee (Capsular ligament)
M2369	Other spontaneous disruption of ligament(s) of knee (Unspecified ligament or Unspecified meniscus)
M238	Other internal derangements of knee
M2380	Other internal derangements of knee (Multiple sites)
M2381	Other internal derangements of knee (Anterior cruciate ligament or Anterior horn of medial meniscus)
M2382	Other internal derangements of knee (Posterior cruciate ligament or Posterior horn of medial meniscus)
M2383	Other internal derangements of knee (Medial collateral ligament or Other and unspecified medial meniscus)
M2384	Other internal derangements of knee (Lateral collateral ligament or Anterior horn of lateral meniscus)
M2385	Other internal derangements of knee (Posterior horn of lateral meniscus)
M2386	Other internal derangements of knee (Other and unspecified lateral meniscus)
M2387	Other internal derangements of knee (Capsular ligament)
M2389	Other internal derangements of knee (Unspecified ligament or Unspecified meniscus)
M239	Internal derangement of knee, unspecified
M2390	Internal derangement of knee, unspecified (Multiple sites)
M2391	Internal derangement of knee, unspecified (Anterior cruciate ligament or Anterior horn of medial meniscus)
M2392	Internal derangement of knee, unspecified (Posterior cruciate ligament or Posterior horn of medial meniscus)
M2393	Internal derangement of knee, unspecified (Medial collateral ligament or Other and unspecified medial meniscus)
M2394	Internal derangement of knee, unspecified (Lateral collateral ligament or Anterior horn of lateral meniscus)
M2395	Internal derangement of knee, unspecified (Posterior horn of lateral meniscus)
M2396	Internal derangement of knee, unspecified (Other and unspecified lateral meniscus)
M2397	Internal derangement of knee, unspecified (Capsular ligament)
M2399	Internal derangement of knee, unspecified (Unspecified ligament or Unspecified meniscus)
M24	Other specific joint derangements
M240	Loose body in joint
M2400	Loose body in joint (Multiple sites)
M2401	Loose body in joint (Shoulder region)
M2402	Loose body in joint (Upper arm)
M2403	Loose body in joint (Forearm)
M2404	Loose body in joint (Hand)
M2405	Loose body in joint (Pelvic region and thigh)
M2406	Loose body in joint-Lower leg
M2407	Loose body in joint (Ankle and foot)
M2408	Loose body in joint (Other)
M2409	Loose body in joint (Site unspecified)
M241	Other articular cartilage disorders
M2410	Other articular cartilage disorders (Multiple sites)
M2411	Other articular cartilage disorders (Shoulder region)
M2412	Other articular cartilage disorders (Upper arm)
M2413	Other articular cartilage disorders (Forearm)
M2414	Other articular cartilage disorders (Hand)
M2415	Other articular cartilage disorders (Pelvic region and thigh)
M2416	Other articular cartilage disorders (Lower leg)
M2417	Other articular cartilage disorders (Ankle and foot)
M2418	Other articular cartilage disorders (Other)
M2419	Other articular cartilage disorders (Site unspecified)
M242	Disorder of ligament
M2420	Disorder of ligament (Multiple sites)
M2421	Disorder of ligament (Shoulder region)
M2422	Disorder of ligament (Upper arm)
M2423	Disorder of ligament (Forearm)
M2424	Disorder of ligament (Hand)
M2425	Disorder of ligament (Pelvic region and thigh)
M2426	Disorder of ligament (Lower leg)
M2427	Disorder of ligament (Ankle and foot)
M2428	Disorder of ligament (Other)
M2429	Disorder of ligament (Site unspecified)
M243	Pathological dislocation and subluxation of joint, not elsewhere classified
M2430	Pathological dislocation and subluxation of joint, not elsewhere classified (Multiple sites)
M2434	Pathological dislocation and subluxation of joint, not elsewhere classified (Hand)
M2435	Pathological dislocation and subluxation of joint, not elsewhere classified (Pelvic region and thigh)
M2436	Pathological dislocation and subluxation of joint, not elsewhere classified (Lower leg)
M2439	Pathological dislocation and subluxation of joint, not elsewhere classified (Site unspecified)
M244	Recurrent dislocation and subluxation of joint
M2440	Recurrent dislocation and subluxation of joint (Multiple sites)
M2444	Recurrent dislocation and subluxation of joint (Hand)
M2445	Recurrent dislocation and subluxation of joint (Pelvic region and thigh)
M2446	Recurrent dislocation and subluxation of joint (Lower leg)
M2449	Recurrent dislocation and subluxation of joint (Site unspecified)
M245	Contracture of joint
M2450	Contracture of joint (Multiple sites)
M2454	Contracture of joint (Hand)
M2455	Contracture of joint (Pelvic region and thigh)
M2456	Contracture of joint (Lower leg)
M2459	Contracture of joint (Site unspecified)
M246	Ankylosis of joint
M2460	Ankylosis of joint (Multiple sites)
M2464	Ankylosis of joint (Hand)
M2465	Ankylosis of joint (Pelvic region and thigh)
M2466	Ankylosis of joint (Lower leg)
M2469	Ankylosis of joint (Site unspecified)
M247	Protrusio acetabuli
M2470	Protrusio acetabuli-Mult sites
M2471	Protrusio acetabuli-Shldr region
M2472	Protrusio acetabuli-Upper arm
M2473	Protrusio acetabuli-Forearm
M2474	Protrusio acetabuli-Hand
M2475	Protrusio acetabuli-Pelvic/thigh
M2476	Protrusio acetabuli-Lower leg
M2477	Protrusio acetabuli-Ankle/foot
M2478	Protrusio acetabuli-Other
M2479	Protrusio acetabuli-Site unspec
M248	Other specific joint derangements, not elsewhere classified
M2480	Other specific joint derangements, not elsewhere classified (Multiple sites)
M2484	Other specific joint derangements, not elsewhere classified (Hand)
M2485	Other specific joint derangements, not elsewhere classified (Pelvic region and thigh)
M2486	Other specific joint derangements, not elsewhere classified (Lower leg)
M2489	Other specific joint derangements, not elsewhere classified (Site unspecified)
M249	Joint derangement, unspecified
M2490	Joint derangement, unspecified (Multiple sites)
M2494	Joint derangement, unspecified (Hand)
M2495	Joint derangement, unspecified (Pelvic region and thigh)
M2496	Joint derangement, unspecified (Lower leg)
M2499	Joint derangement, unspecified (Site unspecified)
M25	Other joint disorders, not elsewhere classified
M255	Pain in joint
M2550	Pain in joint (Multiple sites)
M2551	Pain in joint (Shoulder region)
M2552	Pain in joint (Upper arm)
M2553	Pain in joint (Forearm)
M2554	Pain in joint (Hand)
M2555	Pain in joint (Pelvic region and thigh)
M2556	Pain in joint (Lower leg)
M2557	Pain in joint (Ankle and foot)
M2558	Pain in joint (Other)
M2559	Pain in joint (Site unspecified)
M256	Stiffness of joint, not elsewhere classified
M2560	Stiffness of joint, not elsewhere classified (Multiple sites)
M2561	Stiffness of joint, not elsewhere classified (Shoulder region)
M2562	Stiffness of joint, not elsewhere classified (Upper arm)
M2563	Stiffness of joint, not elsewhere classified (Forearm)
M2564	Stiffness of joint, not elsewhere classified (Hand)
M2565	Stiffness of joint, not elsewhere classified (Pelvic region and thigh)
M2566	Stiffness of joint, not elsewhere classified (Lower leg)
M2567	Stiffness of joint, not elsewhere classified (Ankle and foot)
M2568	Stiffness of joint, not elsewhere classified (Other)
M2569	Stiffness of joint, not elsewhere classified (Site unspecified)
M257	Osteophyte
M2570	Osteophyte (Multiple sites)
M2571	Osteophyte (Shoulder region)
M2572	Osteophyte (Upper arm)
M2573	Osteophyte (Forearm)
M2574	Osteophyte (Hand)
M2575	Osteophyte (Pelvic region and thigh)
M2576	Osteophyte (Lower leg)
M2577	Osteophyte (Ankle and foot)
M2578	Osteophyte (Other)
M2579	Osteophyte (Site unspecified)
M258	Other specified joint disorders
M2580	Other specified joint disorders (Multiple sites)
M2581	Other specified joint disorders (Shoulder region)
M2582	Other specified joint disorders (Upper arm)
M2583	Other specified joint disorders (Forearm)
M2584	Other specified joint disorders (Hand)
M2585	Other specified joint disorders (Pelvic region and thigh)
M2586	Other specified joint disorders (Lower leg)
M2587	Other specified joint disorders (Ankle and foot)
M2588	Other specified joint disorders (Other)
M2589	Other specified joint disorders (Site unspecified)
M259	Joint disorder, unspecified
M2590	Joint disorder, unspecified (Multiple sites)
M2591	Joint disorder, unspecified (Shoulder region)
M2592	Joint disorder, unspecified (Upper arm)
M2593	Joint disorder, unspecified (Forearm)
M2594	Joint disorder, unspecified (Hand)
M2595	Joint disorder, unspecified (Pelvic region and thigh)
M2596	Joint disorder, unspecified (Lower leg)
M2597	Joint disorder, unspecified (Ankle and foot)
M2598	Joint disorder, unspecified (Other)
M2599	Joint disorder, unspecified (Site unspecified)
M42	Spinal osteochondrosis
M420	Juvenile osteochondrosis of spine
M4200	Juvenile osteochondrosis of spine (Multiple sites in spine)
M4201	Juvenile osteochondrosis of spine (Occipito-atlanto-axial region)
M4202	Juvenile osteochondrosis of spine (Cervical region)
M4203	Juvenile osteochondrosis of spine (Cervicothoracic region)
M4204	Juvenile osteochondrosis of spine (Thoracic region)
M4205	Juvenile osteochondrosis of spine (Thoracolumbar region)
M4206	Juvenile osteochondrosis of spine (Lumbar region)
M4207	Juvenile osteochondrosis of spine (Lumbosacral region)
M4208	Juvenile osteochondrosis of spine (Sacral and sacrococcygeal region)
M4209	Juvenile osteochondrosis of spine (Site unspecified)
M421	Adult osteochondrosis of spine
M4210	Adult osteochondrosis of spine (Multiple sites in spine)
M4211	Adult osteochondrosis of spine (Occipito-atlanto-axial region)
M4212	Adult osteochondrosis of spine (Cervical region)
M4213	Adult osteochondrosis of spine (Cervicothoracic region)
M4214	Adult osteochondrosis of spine (Thoracic region)
M4215	Adult osteochondrosis of spine (Thoracolumbar region)
M4216	Adult osteochondrosis of spine (Lumbar region)
M4217	Adult osteochondrosis of spine (Lumbosacral region)
M4218	Adult osteochondrosis of spine (Sacral and sacrococcygeal region)
M4219	Adult osteochondrosis of spine (Site unspecified)
M429	Spinal osteochondrosis, unspecified
M4290	Spinal osteochondrosis, unspecified (Multiple sites in spine)
M4291	Spinal osteochondrosis, unspecified (Occipito-atlanto-axial region)
M4292	Spinal osteochondrosis, unspecified (Cervical region)
M4293	Spinal osteochondrosis, unspecified (Cervicothoracic region)
M4294	Spinal osteochondrosis, unspecified (Thoracic region)
M4295	Spinal osteochondrosis, unspecified (Thoracolumbar region)
M4296	Spinal osteochondrosis, unspecified (Lumbar region)
M4297	Spinal osteochondrosis, unspecified (Lumbosacral region)
M4298	Spinal osteochondrosis, unspecified (Sacral and sacrococcygeal region)
M4299	Spinal osteochondrosis, unspecified (Site unspecified)
M472	Other spondylosis with radiculopathy
M4720	Other spondylosis with radiculopathy (Multiple sites in spine)
M4721	Other spondylosis with radiculopathy (Occipito-atlanto-axial region)
M4722	Other spondylosis with radiculopathy (Cervical region)
M4723	Other spondylosis with radiculopathy (Cervicothoracic region)
M4724	Other spondylosis with radiculopathy (Thoracic region)
M4725	Other spondylosis with radiculopathy (Thoracolumbar region)
M4726	Other spondylosis with radiculopathy (Lumbar region)
M4727	Other spondylosis with radiculopathy (Lumbosacral region)
M4728	Other spondylosis with radiculopathy (Sacral and sacrococcygeal region)
M4729	Other spondylosis with radiculopathy (Site unspecified)
M478	Other spondylosis
M4780	Other spondylosis (Multiple sites in spine)
M4781	Other spondylosis (Occipito-atlanto-axial region)
M4782	Other spondylosis (Cervical region)
M4783	Other spondylosis (Cervicothoracic region)
M4784	Other spondylosis (Thoracic region)
M4785	Other spondylosis (Thoracolumbar region)
M4786	Other spondylosis (Lumbar region)
M4787	Other spondylosis (Lumbosacral region)
M4788	Other spondylosis (Sacral and sacrococcygeal region)
M4789	Other spondylosis (Site unspecified)
M479	Spondylosis, unspecified
M4790	Spondylosis, unspecified (Multiple sites in spine
M4791	Spondylosis, unspecified (Occipito-atlanto-axial region)
M4792	Spondylosis, unspecified (Cervical region)
M4793	Spondylosis, unspecified (Cervicothoracic region)
M4794	Spondylosis, unspecified (Thoracic region)
M4795	Spondylosis, unspecified (Thoracolumbar region)
M4796	Spondylosis, unspecified (Lumbar region)
M4797	Spondylosis, unspecified (Lumbosacral region)
M4798	Spondylosis, unspecified (Sacral and sacrococcygeal region)
M4952	Collapsed vertebra in diseases classified elsewhere (Cervical region)
M4953	Collapsed vertebra in diseases classified elsewhere (Cervicothoracic region)
M4954	Collapsed vertebra in diseases classified elsewhere (Thoracic region)
M4955	Collapsed vertebra in diseases classified elsewhere (Thoracolumbar region)
M4956	Collapsed vertebra in diseases classified elsewhere (Lumbar region)
M4957	Collapsed vertebra in diseases classified elsewhere (Lumbosacral region)
M4958	Collapsed vertebra in diseases classified elsewhere (Sacral and sacrococcygeal region)
M4959	Collapsed vertebra in diseases classified elsewhere (Site unspecified)
M498	Spondylopathy in other diseases classified elsewhere
M4980	Spondylopathy in other diseases classified elsewhere (Multiple sites in spine)
M4981	Spondylopathy in other diseases classified elsewhere (Occipito-atlanto-axial region)
M4982	Spondylopathy in other diseases classified elsewhere (Cervical region)
M4983	Spondylopathy in other diseases classified elsewhere (Cervicothoracic region)
M4984	Spondylopathy in other diseases classified elsewhere (Thoracic region)
M4985	Spondylopathy in other diseases classified elsewhere (Thoracolumbar region)
M4986	Spondylopathy in other diseases classified elsewhere (Lumbar region)
M4987	Spondylopathy in other diseases classified elsewhere (Lumbosacral region)
M4988	Spondylopathy in other diseases classified elsewhere (Sacral and sacrococcygeal region)
M4989	Spondylopathy in other diseases classified elsewhere (Site unspecified)
M50	Cervical disk disorders
M501	Cervical disk disorder with radiculopathy
M502	Other cervical disk displacement
M503	Other cervical disk degeneration
M508	Other cervical disk disorders
M509	Cervical disk disorder, unspecified
M51	Other intervertebral disk disorders
M949	Disorder of cartilage, unspecified
M9490	Disorder of cartilage, unspecified (Multiple sites)
M9491	Disorder of cartilage, unspecified (Shoulder region)
M9492	Disorder of cartilage, unspecified (Upper arm)
M9493	Disorder of cartilage, unspecified (Forearm)
M9494	Disorder of cartilage, unspecified (Hand)
M9495	Disorder of cartilage, unspecified (Pelvic region and thigh)
M9496	Disorder of cartilage, unspecified (Lower leg)
M9497	Disorder of cartilage, unspecified (Ankle and foot)
M9498	Disorder of cartilage, unspecified (Other)
M9499	Disorder of cartilage, unspecified (Site unspecified)
Q65	Congenital deformities of hip
Q650	Congenital dislocation of hip, unilateral
Q651	Congenital dislocation of hip, bilateral
Q652	Congenital dislocation of hip, unspecified
Q653	Congenital subluxation of hip, unilateral
Q654	Congenital subluxation of hip, bilateral
Q655	Congenital subluxation of hip, unspecified
Q656	Unstable hip
Q658	Other congenital deformities of hip
Q659	Congenital deformity of hip, unspecified
V134	Personal history of arthritis
V135	Personal history of other musculoskeletal disorders
V136	Personal history of congenital malformations
ICD 9 code	exclusion criteria
712	Crystal arthropathies
7121	Chondrocalcinosis due to dicalcium phosphate crystals
7122	Chondrocalcinosis due to pyrophosphate crystals
7123	Chondrocalcinosis, unspecified"
7128	Other specified crystal arthropathies
71280	Other specified crystal arthropathies (multiple sites)
71281	Other specified crystal arthropathies (shoulder region)
71282	Other specified crystal arthropathies (upper arm)
71283	Other specified crystal arthropathies (forearm)
71284	Other specified crystal arthropathies (hand)
71285	Other specified crystal arthropathies (pelvic region and thigh)
71286	Other specified crystal arthropathies (lower leg)
71287	Other specified crystal arthropathies (ankle and foot)
71288	Other specified crystal arthropathies (other specified site)
71289	Other specified crystal arthropathies (site unspecified)
7129	Unspecified crystal arthropathy
71290	Unspecified crystal arthropathy (multiple sites)
71291	Unspecified crystal arthropathy (shoulder region)
71292	Unspecified crystal arthropathy (upper arm)
71293	Unspecified crystal arthropathy (forearm)
71294	Unspecified crystal arthropathy (hand)
71295	Unspecified crystal arthropathy (pelvic region and thigh)
71296	Unspecified crystal arthropathy (lower leg)
71297	Unspecified crystal arthropathy (ankle and foot)
71298	Unspecified crystal arthropathy (other specified site)
71299	Unspecified crystal arthropathy (site unspecified)
715	Osteoarthrosis and allied disorders
7150	Generalized osteoarthrosis and allied disorders
7151	Localised, primary osteoarthrosis and allied disorders
71510	Localised, primary osteoarthrosis and allied disorders (multiple sites)
71511	Localised, primary osteoarthrosis and allied disorders (shoulder region)
71512	Localised, primary osteoarthrosis and allied disorders (upper arm)
71513	Localised, primary osteoarthrosis and allied disorders (forearm)
71514	Localised, primary osteoarthrosis and allied disorders (hand)
71515	Localised prim. osteoarthrosis/allied dis. (pelvic region and thigh)
71516	Localised, primary osteoarthrosis and allied disorders (lower leg)
71517	Localised, primary osteoarthrosis and allied disorders (ankle and foot)
71518	Localised, prim. osteoarthrosis/allied dis. (other specified site)
71519	Localised, primary osteoarthrosis and allied disorders (site unspecified)
7152	Localised, secondary osteoarthritis and allied disorders
71520	Localised, secondary osteoarthrosis and allied disorders (multiple sites)
71521	Localised, secondary osteoarthrosis and allied disorders (shoulder region)
71522	Localised, secondary osteoarthrosis and allied disorders (upper arm)
71523	Localised, secondary osteoarthrosis and allied disorders (forearm)
71524	Localised, secondary osteoarthrosis and allied disorders (hand)
71525	Localised, second. osteoarthrosis/allied dis. (pelvic region and thigh)
71526	Localised, secondary osteoarthrosis and allied disorders (lower leg)
71527	Localised, secondary osteoarthrosis and allied disorders (ankle and foot)
71528	Localised second. osteoarthrosis/allied dis. (other specified site)
71529	Localised second. osteoarthrosis/allied dis. (unspecified site)
7153	Unspecified localised osteoarthritis and allied disorders
71530	Unspec. localised osteoarthrosis/allied dis. (multiple sites)
71531	Unspec. localised osteoarthrosis/allied dis. (shoulder region)
71532	Unspec. localised osteoarthrosis/allied dis. (upper arm)
71533	Unspec. localised osteoarthrosis/allied dis. (forearm)
71534	Unspec. localised osteoarthrosis/allied dis. (hand)
71535	Unspec. localised osteoarthrosis/allied dis. (pelvic region and thigh)
71536	Unspec. localised osteoarthrosis/allied dis. (lower leg)
71537	Unspec. localised osteoarthrosis/allied dis. (ankle and foot)
71538	Unspec. localised osteoarthrosis/allied dis. (other specified site)
71539	Unspec. localised osteoarthrosis/allied dis. (unspecified site)
7158	Osteoarthrosis/allied dis. more than one site but not generalized
7159	Osteoarthrosis/allied dis. not spec. whether gen. or loc.
7161	Traumatic arthropathy
71610	Traumatic arthropathy (multiple sites)
71611	Traumatic arthropathy (shoulder region)
71612	Traumatic arthropathy (upper arm)
71613	Traumatic arthropathy (forearm)
71614	Traumatic arthropathy (hand)
71615	Traumatic arthropathy (pelvic region and thigh)
71616	Traumatic arthropathy (lower leg)
71617	Traumatic arthropathy (ankle and foot)
71618	Traumatic arthropathy (other specified site)
71619	Traumatic arthropathy (site unspecified)
7165	Unspecified polyarthropathy or polyarthritis
71650	Unspecified polyarthropathy or polyarthritis (multiple sites)
71654	Unspecified polyarthropathy or polyarthritis (hand)
71655	Unspecified polyarthropathy or polyarthritis (pelvic region and thigh)
71656	Unspecified polyarthropathy or polyarthritis (lower leg)
71659	Unspecified polyarthropathy or polyarthritis (site unspecified)
7166	Unspecified monoarthritis
71660	Unspecified monoarthritis (multiple sites)
71664	Unspecified monoarthritis (hand)
71665	Unspecified monoarthritis (pelvic region and thigh)
71666	Unspecified monoarthritis (lower leg)
71669	Unspecified monoarthritis (site unspecified)
7168	Other specified arthropathy
71680	Other specified arthropathy (multiple sites)
71681	Other specified arthropathy (shoulder region)
71682	Other specified arthropathy (upper arm)
71683	Other specified arthropathy (forearm)
71684	Other specified arthropathy (hand)
71685	Other specified arthropathy (pelvic region and thigh)
71686	Other specified arthropathy (lower leg)
71687	Other specified arthropathy (ankle and foot)
71688	Other specified arthropathy (other specified site)
71689	Other specified arthropathy (site unspecified)
7169	Unspecified arthropathy
71690	Unspecified arthropathy (multiple sites)
71691	Unspecified arthropathy (shoulder region)
71692	Unspecified arthropathy (upper arm)
71693	Unspecified arthropathy (forearm)
71694	Unspecified arthropathy (hand)
71695	Unspecified arthropathy (pelvic region and thigh)
71696	Unspecified arthropathy (lower leg)
71697	Unspecified arthropathy (ankle and foot)
71698	Unspecified arthropathy (other specified site)
71699	Unspecified arthropathy (site unspecified)
717	Internal derangement of knee
7170	Old bucket handle tear of medial meniscus
7171	Derangement of anterior horn of medial meniscus
7172	Derangement of posterior horn of medial meniscus
7173	Other and unspecified derangement of medial meniscus
7174	Derangement of lateral meniscus
7175	Derangement of meniscus, not elsewhere classified
7176	Loose body in knee
7178	Other specified internal derangement of knee
7179	Unspecified internal derangement of knee
718	Other derangement of joint
7180	Articular cartilage disorder
71800	Articular cartilage disorder (multiple sites)
71801	Articular cartilage disorder (shoulder region)
71802	Articular cartilage disorder (upper arm)
71803	Articular cartilage disorder (forearm)
71804	Articular cartilage disorder (hand)
71805	Articular cartilage disorder (pelvic region and thigh)
71806	Articular cartilage disorder (lower leg)
71807	Articular cartilage disorder (ankle and foot)
71808	Articular cartilage disorder (other specified site)
71809	Articular cartilage disorder (site unspecified)
7181	Loose body in joint
71810	Loose body in joint (multiple sites)
71811	Loose body in joint (shoulder region)
71812	Loose body in joint (upper arm)
71813	Loose body in joint (forearm)
71814	Loose body in joint (hand)
71815	Loose body in joint (pelvic region and thigh)
71816	Loose body in joint (lower leg)
71817	Loose body in joint (ankle and foot)
71818	Loose body in joint (other specified site)
71819	Loose body in joint (site unspecified)
7182	Pathological dislocation
71820	Pathological dislocation (multiple sites)
71821	Pathological dislocation (shoulder region)
71822	Pathological dislocation (upper arm)
71823	Pathological dislocation (forearm)
71824	Pathological dislocation (hand)
71825	Pathological dislocation (pelvic region and thigh)
71826	Pathological dislocation (lower leg)
71827	Pathological dislocation (ankle and foot)
71828	Pathological dislocation (other specified site)
71829	Pathological dislocation (site unspecified)
7183	Recurrent dislocation of joint
71830	Recurrent dislocation of joint (multiple sites)
71831	Recurrent dislocation of joint (shoulder region)
71832	Recurrent dislocation of joint (upper arm)
71833	Recurrent dislocation of joint (forearm)
71834	Recurrent dislocation of joint (hand)
71835	Recurrent dislocation of joint (pelvic region and thigh)
71836	Recurrent dislocation of joint (lower leg)
71837	Recurrent dislocation of joint (ankle and foot)
71838	Recurrent dislocation of joint (other specified site)
71839	Recurrent dislocation of joint (site unspecified)
7184	Contracture of joint
71840	Contracture of joint (multiple sites)
71841	Contracture of joint (shoulder region)
71842	Contracture of joint (upper arm)
71843	Contracture of joint (forearm)
71844	Contracture of joint (hand)
71845	Contracture of joint (pelvic region and thigh)
71846	Contracture of joint (lower leg)
71847	Contracture of joint (ankle and foot)
71848	Contracture of joint (other specified site)
71849	Contracture of joint (site unspecified)
7185	Ankylosis of joint
71850	Ankylosis of joint (multiple sites)
71851	Ankylosis of joint (shoulder region)
71852	Ankylosis of joint (upper arm)
71853	Ankylosis of joint (forearm)
71854	Ankylosis of joint (hand)
71855	Ankylosis of joint (pelvic region and thigh)
71856	Ankylosis of joint (lower leg)
71857	Ankylosis of joint (ankle and foot)
71858	Ankylosis of joint (other specified site)
71859	Ankylosis of joint (site unspecified)
7186	Unspecified protrusio acetabuli
71860	Unspecified protrusio acetabuli (multiple sites)
71861	Unspecified protrusio acetabuli (shoulder region)
71862	Unspecified protrusio acetabuli (upper arm)
71863	Unspecified protrusio acetabuli (forearm)
71864	Unspecified protrusio acetabuli (hand)
71865	Unspecified protrusio acetabuli (pelvic region and thigh)
71866	Unspecified protrusio acetabuli (lower leg)
71867	Unspecified protrusio acetabuli (ankle and foot)
71868	Unspecified protrusio acetabuli (other specified site)
71869	Unspecified protrusio acetabuli (site unspecified)
7188	Other joint derangement not elsewhere classified
71880	Other joint derangement not elsewhere classified (multiple sites)
71881	Other joint derangement not elsewhere classified (shoulder region)
71882	Other joint derangement not elsewhere classified (upper arm)
71883	Other joint derangement not elsewhere classified (forearm)
71884	Other joint derangement not elsewhere classified (hand)
71885	Other joint derangement not elsewhere classified (pelvic region and thigh)
71886	Other joint derangement not elsewhere classified (lower leg)
71887	Other joint derangement not elsewhere classified (ankle and foot)
71888	Other joint derangement not elsewhere classified (other specified site)
71889	Other joint derangement not elsewhere classified (site unspecified)
7189	Unspecified derangement of joint
71890	Unspecified derangement of joint (multiple sites)
71891	Unspecified derangement of joint (shoulder region)
71892	Unspecified derangement of joint (upper arm)
71893	Unspecified derangement of joint (forearm)
71894	Unspecified derangement of joint (hand)
71895	Unspecified derangement of joint (pelvic region and thigh)
71896	Unspecified derangement of joint (lower leg)
71897	Unspecified derangement of joint (ankle and foot)
71898	Unspecified derangement of joint (other specified site
71899	Unspecified derangement of joint (site unspecified)
7192	Villonodular synovitis
71920	Villonodular synovitis (multiple sites)
71921	Villonodular synovitis (shoulder region)
71922	Villonodular synovitis (upper arm)
71923	Villonodular synovitis (forearm)
71924	Villonodular synovitis (hand)
71925	Villonodular synovitis (pelvic region and thigh)
71926	Villonodular synovitis (lower leg)
71927	Villonodular synovitis (ankle and foot)
71928	Villonodular synovitis (other specified site)
71929	Villonodular synovitis (site unspecified)
7194	Pain in joint
71940	Pain in joint (multiple sites)
71941	Pain in joint (shoulder region)
71942	Pain in joint (upper arm)
71943	Pain in joint (forearm)
71944	Pain in joint (hand)
71945	Pain in joint (pelvic region and thigh)
71946	Pain in joint (lower leg)
71947	Pain in joint (ankle and foot)
71948	Pain in joint (other specified site)
71949	Pain in joint (site unspecified)
7195	Stiffness of joint, not elsewhere classified
71950	Stiffness of joint, not elsewhere classified (multiple sites)
71951	Stiffness of joint, not elsewhere classified (shoulder region)
71952	Stiffness of joint, not elsewhere classified (upper arm)
71953	Stiffness of joint, not elsewhere classified (forearm)
71954	Stiffness of joint, not elsewhere classified (hand)
71955	Stiffness of joint, not elsewhere classified (pelvic region and thigh)
71956	Stiffness of joint, not elsewhere classified (lower leg)
71957	Stiffness of joint, not elsewhere classified (ankle and foot)
71958	Stiffness of joint, not elsewhere classified (other specified site
71959	Stiffness of joint, not elsewhere classified (site unspecified)
7196	Other symptoms referable to joint
71960	Other symptoms referable to joint (multiple sites)
71961	Other symptoms referable to joint (shoulder region)
71962	Other symptoms referable to joint (upper arm)
71963	Other symptoms referable to joint (forearm)
71964	Other symptoms referable to joint (hand)
71965	Other symptoms referable to joint (pelvic region and thigh)
71966	Other symptoms referable to joint (lower leg)
71967	Other symptoms referable to joint (ankle and foot)
71968	Other symptoms referable to joint (other specified site)
71969	Other symptoms referable to joint (site unspecified)
7197	Difficulty in walking
7198	Other specified disorder of joint
71980	Other specified disorder of joint (multiple sites)
71981	Other specified disorder of joint (shoulder region)
71982	Other specified disorder of joint (upper arm)
71983	Other specified disorder of joint (forearm)
71984	Other specified disorder of joint (hand)
71985	Other specified disorder of joint (pelvic region and thigh)
71986	Other specified disorder of joint (lower leg)
71987	Other specified disorder of joint (ankle and foot)
71988	Other specified disorder of joint (other specified site)
71989	Other specified disorder of joint (site unspecified)
7199	Unspecified disorder of joint
71990	Unspecified disorder of joint (multiple sites)
71991	Unspecified disorder of joint (shoulder region)
71992	Unspecified disorder of joint (upper arm)
71993	Unspecified disorder of joint (forearm)
71994	Unspecified disorder of joint (hand)
71995	Unspecified disorder of joint (pelvic region and thigh)
71996	Unspecified disorder of joint (lower leg)
71997	Unspecified disorder of joint (ankle and foot)
71998	Unspecified disorder of joint (other specified site)
71999	Unspecified disorder of joint (site unspecified)
7200	Ankylosing spondylitis
721	Spondylosis and allied disorders
7210	Cervical spondylosis without myelopathy
7211	Cervical spondylosis with myelopathy
7212	Thoracic spondylosis without myelopathy
7213	Lumbosacral spondylosis without myelopathy
7214	Thoracic or lumbar spondylosis with myelopathy
7215	Kissing spine
7216	Ankylosing vertebral hyperostosis
7217	Traumatic spondylopathy
7218	Other spondylosis and allied disorders
7219	Spondylosis of unspecified site
722	Intervertebral disc disorders
7220	Displacement of cervical intervertebral disc without myelopathy
7221	Displacement of thoracic or lumbar intervertebral disc without myelopathy
7222	Displacement of intervertebral disc, site unspecified, without myelopathy
7223	Schmorl's nodes
7224	Degeneration of cervical intervertebral disc
7225	Degeneration of thoracic or lumbar intervertebral disc
7226	Degeneration of intervertebral disc, site unspecified
7229	Other and unspecified disc disorder
723	Other disorders of cervical region
7230	Spinal stenosis in cervical region
7231	Cervicalgia
7295	Pain in limb
72950	Pain in limb (multiple sites)
72951	Pain in limb (shoulder region)
72952	Pain in limb (upper arm)
72953	Pain in limb (forearm)
72954	Pain in limb (hand)
72955	Pain in limb (pelvic region and thigh)
72956	Pain in limb (lower leg)
72957	Pain in limb (ankle and foot)
72958	Pain in limb (other specified site)
72959	Pain in limb (site unspecified)
73100	Osteitis deformans without mention of bone tumour (multiple sites)
73101	Osteitis deformans without mention of bone tumour (shoulder region)
73102	Osteitis deformans without mention of bone tumour (upper arm)
73103	Osteitis deformans without mention of bone tumour (forearm)
73104	Osteitis deformans without mention of bone tumour (hand)
732	Osteochondropathies
7320	Juvenile osteochondrosis of spine
7321	Juvenile osteochondrosis of hip and pelvis
7322	Nontraumatic slipped upper femoral epiphysis
7323	Juvenile osteochondrosis of upper extremity
7324	Juvenile osteochondrosis of lower extremity, excluding foot
7325	Juvenile osteochondrosis of foot
7326	Other juvenile osteochondrosis
7327	Osteochondritis dissecans
73270	Osteochondritis dissecans (multiple sites)
73271	Osteochondritis dissecans (shoulder region)
73272	Osteochondritis dissecans (upper arm)
73273	Osteochondritis dissecans (forearm)
73274	Osteochondritis dissecans (hand)
73275	Osteochondritis dissecans (pelvic region and thigh)
73276	Osteochondritis dissecans (lower leg)
73277	Osteochondritis dissecans (ankle and foot)
73278	Osteochondritis dissecans (other specified site)
73279	Osteochondritis dissecans (site unspecified)
7328	Other specified forms of osteochondropathy
73280	Other specified forms of osteochondropathy (multiple sites)
73281	Other specified forms of osteochondropathy (shoulder region)
73282	Other specified forms of osteochondropathy (upper arm)
73283	Other specified forms of osteochondropathy (forearm)
73284	Other specified forms of osteochondropathy (hand)
73285	Other specified forms of osteochondropathy (pelvic region and thigh)
73286	Other specified forms of osteochondropathy (lower leg)
73287	Other specified forms of osteochondropathy (ankle and foot)
73288	Other specified forms of osteochondropathy (other specified site)
73289	Other specified forms of osteochondropathy (site unspecified)
7329	Unspecified osteochondropathy
7339	Other and unspecified disorders of bone and cartilage
73390	Other and unspecified disorders of bone and cartilage (multiple sites)
73391	Other and unspecified disorders of bone and cartilage (shoulder region)
73392	Other and unspecified disorders of bone and cartilage (upper arm)
73393	Other and unspecified disorders of bone and cartilage (forearm)
73394	Other and unspecified disorders of bone and cartilage (hand)
73395	Other/unspec. disorders of bone and cartilage (pelvic region and thigh)
73396	Other and unspecified disorders of bone and cartilage (lower leg)
73397	Other and unspecified disorders of bone and cartilage (ankle and foot)
73398	Other/unspec. disorders of bone and cartilage (other specified site)
73399	Other and unspecified disorders of bone and cartilage (site unspecified)
736	Other acquired deformities of limbs
7362	Other acquired deformities of finger
7363	Acquired deformities of hip
7364	Genu valgum or varum (acquired)
7365	Genu recurvatum (acquired)
7366	Other acquired deformities of knee
7367	Other acquired deformities of ankle and foot
7368	Acquired deformities of other parts of limbs
7369	Acquired deformity of limb, site unspecified
7543	Congenital dislocation of hip
75430	Congenital dislocation of hip (unqualified)
75431	Congenital dislocation of hip (unstable hip)
75432	Congenital dislocation of hip (clicking hip)
7544	Congenital genu recurvatum and bowing of long bones of leg
75440	Congenital bowing, femur
75441	Congenital bowing, tibia and/or fibula
75442	Congenital bow legs, not otherwise specified
75443	Genu recurvatum
75444	Dislocation of knee, congenital
7545	Varus deformities of feet
75450	Varus deformities of feet (talipes equinovarus)
75451	Varus deformities of feet (talipes calcaneovarus)
75452	Varus deformities of feet (metatarsus varus)
75453	Varus deformities of feet (complex varus deformities)
75459	Varus deformities of feet (unspecified)
7546	Valgus deformities of feet
75460	0 Valgus deformities of feet (talipes calcaneovalgus)
75461	Valgus deformities of feet (congenital pes planus)
75469	Valgus deformities of feet (unspecified)
835	Dislocation of hip
8350	Simple dislocation of hip
8351	Compound dislocation of hip
836	Dislocation of knee
8360	Tear of medial cartilage or meniscus of knee, current
8361	Tear of lateral cartilage or meniscus of knee, current
8362	Other tear of cartilage or meniscus of knee, current
8366	Other dislocation of knee, compound"
