# Supplementary material for: A novel variant in GLIS3 is associated with osteoarthritis
Source: Ann Rheum Dis. 2018 Feb 7;77(4):620–3. doi: 10.1136/annrheumdis-2017-211848 (PMC5890630; doi:10.1136/annrheumdis-2017-211848)
Supplement: Supplementary file 6 [file annrheumdis-2017-211848supp006.xlsx]

## Sheet: Sheet1
Table S2. Number of overlapping samples between self-reported, hospital diagnosis, and operated OA cases and controls
SR, self-reported; HD, hospital diagnosis; OP, operation
N cases	SR cases	HD cases	HD_knee_hip cases	OP_knee_hip cases
SR cases	12658	3748	2579	1856
HD cases	3748	10083	6586	4010
HD_knee_hip cases	2579	6586	6586	3901
OP_knee_hip cases	1865	4010	3901	4015
N controls	SR controls	HD controls	HD_knee_hip controls	OP_knee_hip controls
SR controls	50898	40371	26348	16033
HD controls	40371	40425	26384	16042
HD_knee_hip controls	26348	26384	26384	16042
OP_knee_hip controls	16033	16042	16042	16060
