# Supplementary material for: A novel variant in GLIS3 is associated with osteoarthritis
Source: Ann Rheum Dis. 2018 Feb 7;77(4):620–3. doi: 10.1136/annrheumdis-2017-211848 (PMC5890630; doi:10.1136/annrheumdis-2017-211848)
Supplement: Supplementary file 10 [file annrheumdis-2017-211848supp010.xlsx]

## Sheet: Sheet1
Table S4. Comparison of the strength of association of prioritised variants in this study with the previous arcOGEN genome-wide association study.
This study				Previous study
Stratum	SNP_ID	CHR:POS_b37	P	SNP	POS_b36	P	Effect_direction
HIP-OA-TJR	exm-rs2274432	chr1:184020945	9.56699e-05	rs2274432	182287568	0.0003048	--
ALL-OA-TJR	rs10803899	chr2:177348389	7.02387e-05	rs10803899	177056635	0.4595	++
ALL-OA-TJR	exm299207	chr3:37366459	7.07569e-05	rs11718848	37341463	0.05011	++
ALL-OA-TJR	rs6835823	chr4:154972357	5.3289e-05	rs6835823	155191807	0.01798	--
HIP-OA-TJR	rs6887681	chr5:21826642	5.28782e-05	rs6887681	21862399	0.0205	++
K-OA-TJR	rs6893565	chr5:40293299	4.41523e-05	rs6893565	40329056	0.03132	++
ALL-OA-TJR	rs7713532	chr5:123587452	1.61783e-05	rs7713532	123615351	0.3708	++
K-OA-TJR	rs6877893	chr5:142727193	5.9635e-05	rs6877893	142707386	0.07834	++
HIP-OA-TJR	rs734840	chr5:170886468	7.18349e-05	rs734840	170819073	0.2417	++
K-OA-TJR	rs11745375	chr5:170909410	4.33878e-06	rs11745375	170842015	0.04019	++
ALL-OA-TJR	rs2842363	chr6:7267582	4.20129e-05	rs2842363	7212581	0.05164	++
HIP-OA-TJR	rs2237185	chr6:16528671	4.75736e-05	rs2237185	16636650	0.03278	--
HIP-OA-TJR	rs9471080	chr6:39320088	4.65653e-05	rs9471080	39428066	0.4676	++
HIP-OA-TJR	rs9354002	chr6:93947307	2.90075e-05	rs9354002	94004028	0.02143	--
K-OA-TJR	rs1893895	chr6:162440687	8.17453e-05	rs1893895	162360677	0.8982	++
HIP-OA-TJR	rs2976921	chr8:8266397	1.80623e-05	rs2976921	8303807	0.658	--
HIP-OA-TJR	rs2956305	chr8:66008289	7.38731e-05	rs2956305	66170843	0.003051	--
HIP-OA-TJR	rs4436218	chr9:18323073	6.73929e-05	rs4436218	18313073	0.006123	--
HIP-OA-TJR	rs16933690	chr9:119339463	3.98466e-05	rs16933690	118379284	4.249e-05	--
HIP-OA-TJR	rs1247098	chr10:30041106	4.19098e-05	rs1247098	30081112	0.002557	++
HIP-OA-TJR	rs11186642	chr10:93403068	9.8874e-05	rs11186642	93393048	0.07622	--
ALL-OA-TJR	rs642743	chr10:105933417	6.77893e-05	rs642743	105923407	0.007404	++
ALL-OA-TJR	exm914648	chr11:60291413	4.53395e-05	rs6591595	60047989	0.3577	++
ALL-OA-TJR	rs2847212	chr11:60335964	6.46323e-06	rs2847212	60092540	0.152	++
K-OA-TJR	rs641902	chr11:87610338	5.98493e-05	rs641902	87287986	0.01598	--
HIP-OA-TJR	rs258394	chr12:28004886	5.45617e-06	rs258394	27896153	5.19e-05	++
HIP-OA-TJR	rs10843013	chr12:28025196	2.88909e-07	rs10843013	27916463	3.927e-06	++
HIP-OA-TJR	rs11843068	chr13:99621570	8.35184e-05	rs11843068	98419571	0.2679	--
K-OA-TJR	rs12709169	chr16:7106360	5.5803e-05	rs12709169	7046361	0.04234	++
K-OA-TJR	rs1510158	chr16:61929073	2.89254e-05	rs1510158	60486574	0.04411	++
ALL-OA-TJR	rs12953819	chr18:1051047	8.59899e-05	rs12953819	1041047	0.01194	++
HIP-OA-TJR	rs789029	chr18:1053252	5.19786e-06	rs789029	1043252	0.06474	++
HIP-OA-TJR	rs1590202	chr20:2162656	5.4882e-05	rs1590202	2110656	0.2707	++
ALL-OA-TJR	rs6125102	chr20:46386635	7.04471e-05	rs6125102	45820042	0.2511	++
K-OA-TJR	rs9975358	chr21:34579572	5.98662e-05	rs9975358	33501442	0.271	++
HIP-OA-TJR	rs2836627	chr21:40059292	1.6694e-05	rs2836627	38981162	0.0001298	++
