# Supplementary material for: A novel variant in GLIS3 is associated with osteoarthritis
Source: Ann Rheum Dis. 2018 Feb 7;77(4):620–3. doi: 10.1136/annrheumdis-2017-211848 (PMC5890630; doi:10.1136/annrheumdis-2017-211848)
Supplement: Supplementary file 12 [file annrheumdis-2017-211848supp012.xlsx]

## Sheet: Sheet1
Table S6. Discovery, replication and meta-analysis results for the prioritised loci. TJR, total joint replacement
TJR, total joint replacement
DISCOVERY[TJR_knee_hip]										DISCOVERY[TJR_hip]									DISCOVERY[TJR_knee]										REPLICATION[Operation_knee_hip]								REPLICATION[Operation_hip]									REPLICATION[Operation_knee]
rsID	Coordinates_build37	Effect_Alelle	Non_Effect_Allele	Effect_Allele_frequency	N_SAMPLES	N_CASES	N_CONTROLS	OR[95%CIs]	p-value	Coordinates_build37	Effect_Alelle	Non_Effect_Allele	Effect_Allele_frequency	N_SAMPLES	N_CASES	N_CONTROLS	OR[95%CIs]	p-value	Coordinates_build37	Effect_Alelle	Non_Effect_Allele	Effect_Allele_frequency	N_SAMPLES	N_CASES	N_CONTROLS	OR[95%CIs]	p-value	Coordinates_build37	Effect_Alelle	Non_Effect_Allele	Effect_Allele_frequency	N_SAMPLES	N_CASES	N_CONTROLS	OR[95%CIs]	p-value	Coordinates_build37	Effect_Alelle	Non_Effect_Allele	Effect_Allele_frequency	N_SAMPLES	N_CASES	N_CONTROLS	OR[95%CIs]	p-value	Coordinates_build37	Effect_Alelle	Non_Effect_Allele	Effect_Allele_frequency
rs3795263	chr1:2938989	A	G	0.2414	15351	5414	9937	1.03[1.02-1.04]	8.29559e-06	chr1:2938989	A	G	0.2379	12454	2517	9937	1.02[1.01-1.03]	0.000233405	chr1:2938989	A	G	0.2379	12125	2188	9937	1.02[1.01-1.03]	0.000204743	chr1:2938989	A	G	0.244508	20075	4015	16060	0.96[0.9-1.01]	0.127745	chr1:2938989	A	G	0.244924	11475	2282	9193	0.95[0.88-1.02]	0.170489	chr1:2938989	A	G	0.245447
rs9803711	chr1:10996382	A	G	0.477	15353	5414	9939	1.02[1.01-1.03]	9.16243e-05	chr1:10996382	A	G	0.4743	12456	2517	9939	1.02[1.01-1.03]	0.00106025	chr1:10996382	A	G	0.4723	12127	2188	9939	1.01[1-1.02]	0.0224033
rs2157508	chr1:20572621	C	T	0.2765	15350	5413	9937	0.99[0.97-1]	0.0163557	chr1:20572621	C	T	0.2756	12453	2516	9937	0.98[0.97-0.99]	8.98392e-05	chr1:20572621	C	T	0.2811	12125	2188	9937	1[0.99-1.01]	0.952569	chr1:20572621	C	T	0.275567	20075	4015	16060	0.98[0.92-1.03]	0.384589	chr1:20572621	C	T	0.273508	11475	2282	9193	0.99[0.92-1.06]	0.700708	chr1:20572621	C	T	0.273246
rs11591147	chr1:55505647	T	G	0.0172	15353	5414	9939	1.1[1.06-1.14]	4.86924e-06	chr1:55505647	T	G	0.01598	12456	2517	9939	1.07[1.03-1.11]	0.000668306	chr1:55505647	T	G	0.01649	12127	2188	9939	1.09[1.05-1.13]	5.82087e-06	chr1:55505647	T	G	0.018132	20075	4015	16060	0.98[0.81-1.18]	0.820378	chr1:55505647	T	G	0.0177778	11475	2282	9193	0.95[0.74-1.22]	0.708506	chr1:55505647	T	G	0.0178214
rs34495780	chr1:118165536	A	G	0.0004234	15353	5414	9939	1.39[1.08-1.78]	0.0115391	chr1:118165536	A	G	0.0004817	12456	2517	9939	1.59[1.27-1.99]	4.88009e-05	chr1:118165536	A	G	0.0002062	12127	2188	9939	1.03[0.74-1.43]	0.869975
rs858818	chr1:166774997	C	T	0.21	15352	5414	9938	0.98[0.96-0.99]	0.000569876	chr1:166774997	C	T	0.2155	12455	2517	9938	0.99[0.98-1.01]	0.425064	chr1:166774997	C	T	0.211	12126	2188	9938	0.97[0.96-0.99]	2.02741e-05	chr1:166774997	C	T	0.213026	20075	4015	16060	0.92[0.87-0.98]	0.00854222	chr1:166774997	C	T	0.213203	11475	2282	9193	0.91[0.84-0.99]	0.0290948	chr1:166774997	C	T	0.213377
rs2205647	chr1:166778754	C	A	0.3473	15349	5413	9936	0.98[0.97-0.99]	0.000894878	chr1:166778754	C	A	0.353	12453	2517	9936	0.99[0.98-1]	0.19883	chr1:166778754	C	A	0.3489	12124	2188	9936	0.98[0.97-0.99]	3.28434e-05	chr1:166778754	A	C	0.654089	20075	4015	16060	1.04[0.99-1.09]	0.152693	chr1:166778754	A	C	0.654409	11475	2282	9193	1.03[0.96-1.1]	0.394664	chr1:166778754	A	C	0.655002
rs17279712	chr1:179877780	C	A	0.0684	15344	5413	9931	1.03[1.01-1.05]	0.00504799	chr1:179877780	C	A	0.0684	12448	2517	9931	1.04[1.02-1.07]	2.03171e-05	chr1:179877780	C	A	0.06548	12118	2187	9931	1[0.98-1.02]	0.825665	chr1:179877780	C	A	0.0624159	20075	4015	16060	1[0.91-1.11]	0.950777	chr1:179877780	C	A	0.0623094	11475	2282	9193	1.01[0.88-1.15]	0.899922	chr1:179877780	C	A	0.0620915
rs2274432	chr1:184020945	A	G	0.3421	15353	5414	9939	0.98[0.97-0.99]	0.000127317	chr1:184020945	A	G	0.3448	12456	2517	9939	0.98[0.97-0.99]	9.56699e-05	chr1:184020945	A	G	0.3484	12127	2188	9939	0.99[0.98-1]	0.0520595	chr1:184020945	A	G	0.348418	20075	4015	16060	0.96[0.91-1.01]	0.129052	chr1:184020945	A	G	0.345882	11475	2282	9193	0.98[0.91-1.05]	0.522333	chr1:184020945	A	G	0.346318
rs2786119	chr1:197329535	A	C	0.2236	15325	5400	9925	1.02[1-1.03]	0.0106902	chr1:197329535	A	C	0.2196	12438	2513	9925	1.01[1-1.02]	0.22844	chr1:197329535	A	C	0.223	12107	2182	9925	1.03[1.01-1.04]	5.18264e-05	chr1:197329535	C	A	0.77531	20075	4015	16060	1.01[0.95-1.07]	0.74608	chr1:197329535	C	A	0.77658	11475	2282	9193	1.08[1-1.16]	0.0650301	chr1:197329535	C	A	0.77312
rs6708310	chr2:37600427	G	A	0.05871	15322	5401	9921	1.03[1.01-1.06]	0.00506582	chr2:37600427	G	A	0.05643	12431	2510	9921	1.01[0.99-1.03]	0.30174	chr2:37600427	G	A	0.05882	12104	2183	9921	1.04[1.02-1.06]	8.74487e-05	chr2:37600427	G	A	0.0566933	20075	4015	16060	1.06[0.95-1.17]	0.311163	chr2:37600427	G	A	0.057544	11475	2282	9193	1.15[1.01-1.32]	0.0430646	chr2:37600427	G	A	0.0563806
rs4662775	chr2:128870808	T	C	0.0219	15341	5407	9934	1.07[1.03-1.11]	0.000155984	chr2:128870808	T	C	0.02137	12449	2515	9934	1.08[1.04-1.12]	8.94397e-06	chr2:128870808	T	C	0.0203	12119	2185	9934	1.03[1-1.07]	0.0783683	chr2:128870808	C	T	0.975988	20075	4015	16060	1.03[0.88-1.21]	0.714405	chr2:128870808	C	T	0.975943	11475	2282	9193	0.99[0.8-1.22]	0.919966	chr2:128870808	C	T	0.975855
rs6725404	chr2:128972833	A	G	0.02162	15353	5414	9939	1.07[1.03-1.11]	0.000536411	chr2:128972833	A	G	0.0214	12456	2517	9939	1.08[1.05-1.12]	4.25494e-06	chr2:128972833	A	G	0.01996	12127	2188	9939	1.02[0.98-1.05]	0.314242	chr2:128972833	A	G	0.0232152	20075	4015	16060	0.9[0.76-1.07]	0.22984	chr2:128972833	A	G	0.02355	11475	2282	9193	0.93[0.74-1.15]	0.487306	chr2:128972833	A	G	0.0233949
rs115172937	chr2:165551103	G	T	0.002085	15345	5407	9938	1.11[0.99-1.25]	0.0648444	chr2:165551103	G	T	0.001726	12454	2516	9938	1[0.89-1.12]	0.980354	chr2:165551103	G	T	0.00231	12120	2182	9938	1.22[1.11-1.35]	8.023e-05	chr2:165551103	G	T	0.0015061	20075	4015	16060	0.64[0.28-1.46]	0.257605	chr2:165551103	G	T	0.00153835	11475	2282	9193	0.43[0.12-1.57]	0.141569	chr2:165551103	G	T	0.00166549
rs10803899	chr2:177348389	C	T	0.4593	15351	5413	9938	1.02[1.01-1.03]	7.02387e-05	chr2:177348389	C	T	0.4547	12455	2517	9938	1.01[1-1.02]	0.00949821	chr2:177348389	C	T	0.4572	12125	2187	9938	1.02[1.01-1.03]	0.000104576	chr2:177348389	T	C	0.538555	20075	4015	16060	1.01[0.97-1.07]	0.571602	chr2:177348389	T	C	0.536558	11475	2282	9193	1.04[0.98-1.11]	0.212066	chr2:177348389	T	C	0.534118
rs150165484	chr2:238253403	A	G	0.001335	15353	5414	9939	1.19[1.04-1.38]	0.01468	chr2:238253403	A	G	0.001044	12456	2517	9939	1.07[0.92-1.25]	0.356412	chr2:238253403	A	G	0.001402	12127	2188	9939	1.29[1.14-1.47]	7.02151e-05
rs11720782	chr3:31862952	C	T	0.05208	15352	5413	9939	0.95[0.93-0.97]	3.00292e-05	chr3:31862952	C	T	0.05323	12456	2517	9939	0.95[0.93-0.98]	2.49347e-05	chr3:31862952	C	T	0.0543	12126	2187	9939	0.97[0.95-0.99]	0.0046173	chr3:31862952	C	T	0.049863	20075	4015	16060	1.04[0.93-1.16]	0.491738	chr3:31862952	C	T	0.0499346	11475	2282	9193	1.12[0.96-1.29]	0.145544	chr3:31862952	C	T	0.0495425
rs11718848	chr3:37366459	A	C	0.4003	15350	5411	9939	1.03[1.01-1.04]	7.07569e-05	chr3:37366459	A	C	0.3953	12454	2515	9939	1.02[1-1.03]	0.00568706	chr3:37366459	A	C	0.3961	12126	2187	9939	1.02[1.01-1.03]	0.000640268	chr3:37366459	A	C	0.40127	20075	4015	16060	0.98[0.93-1.03]	0.477215	chr3:37366459	A	C	0.403355	11475	2282	9193	0.99[0.92-1.06]	0.712117	chr3:37366459	A	C	0.401394
rs9831792	chr3:37409607	G	T	0.4585	15353	5414	9939	1.03[1.01-1.04]	9.05835e-05	chr3:37409607	G	T	0.4534	12456	2517	9939	1.02[1-1.03]	0.00992988	chr3:37409607	G	T	0.4551	12127	2188	9939	1.02[1.01-1.03]	0.000117639	chr3:37409607	G	T	0.458329	20075	4015	16060	0.98[0.94-1.03]	0.543385	chr3:37409607	G	T	0.461356	11475	2282	9193	1[0.94-1.07]	0.976037	chr3:37409607	G	T	0.458579
rs7682531	chr4:116044411	C	A	0.406	15351	5412	9939	0.98[0.97-0.99]	0.000332907	chr4:116044411	C	A	0.4131	12456	2517	9939	1[0.99-1.01]	0.557183	chr4:116044411	C	A	0.4069	12125	2186	9939	0.98[0.97-0.99]	2.70632e-06	chr4:116044411	A	C	0.594302	20075	4015	16060	1.01[0.96-1.06]	0.757183	chr4:116044411	A	C	0.587855	11475	2282	9193	1.01[0.95-1.08]	0.693328	chr4:116044411	A	C	0.589672
rs6835823	chr4:154972357	G	T	0.4712	15353	5414	9939	0.98[0.97-0.99]	5.3289e-05	chr4:154972357	G	T	0.4744	12456	2517	9939	0.99[0.98-1]	0.00350442	chr4:154972357	G	T	0.4758	12127	2188	9939	0.99[0.98-1]	0.00872429	chr4:154972357	G	T	0.469482	20075	4015	16060	1[0.95-1.05]	0.902467	chr4:154972357	G	T	0.467171	11475	2282	9193	1.02[0.95-1.09]	0.624149	chr4:154972357	G	T	0.467597
rs6887681	chr5:21826642	T	C	0.1002	15352	5413	9939	1.03[1.01-1.05]	0.000967801	chr5:21826642	T	C	0.09964	12455	2516	9939	1.04[1.02-1.05]	5.28782e-05	chr5:21826642	T	C	0.0973	12127	2188	9939	1.02[1-1.03]	0.075837	chr5:21826642	C	T	0.898781	20075	4015	16060	0.99[0.91-1.07]	0.752245	chr5:21826642	C	T	0.896706	11475	2282	9193	0.96[0.86-1.07]	0.443393	chr5:21826642	C	T	0.897259
rs6893565	chr5:40293299	G	A	0.2124	15350	5414	9936	1.02[1.01-1.04]	0.000452732	chr5:40293299	G	A	0.2078	12453	2517	9936	1.01[1-1.02]	0.168341	chr5:40293299	G	A	0.2112	12124	2188	9936	1.03[1.01-1.04]	4.41523e-05	chr5:40293299	A	G	0.781343	20075	4015	16060	0.98[0.92-1.04]	0.542725	chr5:40293299	A	G	0.784008	11475	2282	9193	0.96[0.89-1.04]	0.329685	chr5:40293299	A	G	0.784008
rs200620715	chr5:41012710	C	T	0.0003908	15352	5413	9939	1.73[1.33-2.26]	4.40619e-05	chr5:41012710	C	T	0.000281	12455	2516	9939	1.86[1.39-2.49]	3.36826e-05	chr5:41012710	C	T	0.0002062	12127	2188	9939	1.88[1.35-2.63]	0.000182214
rs6449586	chr5:50634878	C	T	0.4442	15352	5414	9938	0.98[0.97-0.99]	0.00231114	chr5:50634878	C	T	0.4491	12455	2517	9938	0.99[0.98-1]	0.121626	chr5:50634878	C	T	0.4451	12126	2188	9938	0.98[0.97-0.99]	8.51479e-05	chr5:50634878	T	C	0.556937	20075	4015	16060	0.98[0.94-1.03]	0.541659	chr5:50634878	T	C	0.558322	11475	2282	9193	1.03[0.97-1.1]	0.353864	chr5:50634878	T	C	0.554417
rs7713532	chr5:123587452	T	C	0.0666	15353	5414	9939	1.05[1.03-1.07]	1.61783e-05	chr5:123587452	T	C	0.06535	12456	2517	9939	1.04[1.02-1.06]	7.99134e-05	chr5:123587452	T	C	0.06395	12127	2188	9939	1.03[1.01-1.05]	0.0132486	chr5:123587452	T	C	0.0664356	20075	4015	16060	1.08[0.98-1.19]	0.115569	chr5:123587452	T	C	0.06915	11475	2282	9193	1.06[0.93-1.2]	0.401534	chr5:123587452	T	C	0.0690303
rs36715	chr5:127562880	G	A	0.2567	15353	5414	9939	1.02[1-1.03]	0.0140846	chr5:127562880	G	A	0.2517	12456	2517	9939	1[0.99-1.01]	0.953403	chr5:127562880	G	A	0.2568	12127	2188	9939	1.02[1.01-1.04]	3.17862e-05	chr5:127562880	A	G	0.737802	20075	4015	16060	0.99[0.94-1.05]	0.795375	chr5:127562880	A	G	0.739337	11475	2282	9193	1.01[0.93-1.08]	0.863995	chr5:127562880	A	G	0.738179
rs6877893	chr5:142727193	A	G	0.4529	15353	5414	9939	1.02[1.01-1.03]	0.000201437	chr5:142727193	A	G	0.4469	12456	2517	9939	1.01[1-1.02]	0.112928	chr5:142727193	A	G	0.4506	12127	2188	9939	1.02[1.01-1.03]	5.9635e-05	chr5:142727193	A	G	0.460276	20075	4015	16060	0.98[0.93-1.03]	0.348875	chr5:142727193	A	G	0.461278	11475	2282	9193	0.96[0.9-1.03]	0.24422	chr5:142727193	A	G	0.461522
rs734840	chr5:170886468	T	C	0.4811	15351	5412	9939	1.02[1.01-1.03]	0.00108562	chr5:170886468	T	C	0.4806	12455	2516	9939	1.02[1.01-1.03]	7.18349e-05	chr5:170886468	T	C	0.4758	12127	2188	9939	1[0.99-1.01]	0.446914	chr5:170886468	T	C	0.480046	20075	4015	16060	1.06[1.01-1.11]	0.0212467	chr5:170886468	T	C	0.480951	11475	2282	9193	1.07[1-1.14]	0.0414223	chr5:170886468	T	C	0.480288
rs11745375	chr5:170909410	T	C	0.4731	15352	5413	9939	1.02[1.01-1.03]	0.00137108	chr5:170909410	T	C	0.4685	12456	2517	9939	1.01[1-1.02]	0.139637	chr5:170909410	T	C	0.4723	12126	2187	9939	1.02[1.01-1.03]	4.33878e-06	chr5:170909410	T	C	0.46802	20075	4015	16060	0.98[0.94-1.03]	0.52545	chr5:170909410	T	C	0.466754	11475	2282	9193	0.97[0.91-1.03]	0.304225	chr5:170909410	T	C	0.468976
rs2842363	chr6:7267582	G	A	0.3784	15353	5414	9939	1.02[1.01-1.04]	4.20129e-05	chr6:7267582	G	A	0.3748	12456	2517	9939	1.01[1-1.03]	0.00796653	chr6:7267582	G	A	0.3759	12127	2188	9939	1.02[1.01-1.03]	0.000228495	chr6:7267582	G	A	0.376413	20075	4015	16060	1.01[0.96-1.07]	0.589833	chr6:7267582	G	A	0.374858	11475	2282	9193	1.02[0.95-1.09]	0.575733	chr6:7267582	G	A	0.375033
rs6911430	chr6:14015087	A	G	0.0005862	15352	5413	9939	1.34[1.08-1.66]	0.00799093	chr6:14015087	A	G	0.0003613	12455	2516	9939	1.12[0.86-1.44]	0.407157	chr6:14015087	A	G	0.0006185	12127	2188	9939	1.47[1.22-1.79]	7.79258e-05
rs2237185	chr6:16528671	T	C	0.3751	15352	5413	9939	0.98[0.97-0.99]	0.00309254	chr6:16528671	T	C	0.3752	12456	2517	9939	0.98[0.97-0.99]	4.75736e-05	chr6:16528671	T	C	0.381	12127	2188	9939	1[0.99-1.01]	0.865316	chr6:16528671	C	T	0.618532	20075	4015	16060	1.02[0.97-1.08]	0.381496	chr6:16528671	C	T	0.617254	11475	2282	9193	1[0.94-1.07]	0.923027	chr6:16528671	C	T	0.619244
rs2457350	chr6:20084591	T	G	0.2519	15353	5414	9939	0.98[0.97-1]	0.00735676	chr6:20084591	T	G	0.2571	12456	2517	9939	1[0.99-1.01]	0.855147	chr6:20084591	T	G	0.2519	12127	2188	9939	0.98[0.97-0.99]	8.52787e-05	chr6:20084591	G	T	0.747134	20075	4015	16060	1.03[0.97-1.09]	0.353753	chr6:20084591	G	T	0.745835	11475	2282	9193	1.01[0.94-1.09]	0.709335	chr6:20084591	G	T	0.746939
rs9471078	chr6:39310635	A	G	0.06642	15350	5412	9938	1.05[1.02-1.07]	2.55393e-05	chr6:39310635	A	G	0.06488	12454	2516	9938	1.04[1.02-1.06]	0.000300494	chr6:39310635	A	G	0.06366	12126	2188	9938	1.03[1.01-1.05]	0.0123523	chr6:39310635	A	G	0.0667372	20075	4015	16060	0.95[0.86-1.05]	0.306365	chr6:39310635	A	G	0.0653713	11475	2282	9193	0.88[0.77-1.01]	0.0678784	chr6:39310635	A	G	0.0675495
rs9471080	chr6:39320088	G	A	0.1596	15345	5411	9934	1.03[1.02-1.05]	7.49336e-05	chr6:39320088	G	A	0.1583	12451	2517	9934	1.03[1.02-1.04]	4.65653e-05	chr6:39320088	G	A	0.1555	12119	2185	9934	1.01[1-1.03]	0.0405555	chr6:39320088	G	A	0.164805	20075	4015	16060	0.96[0.9-1.02]	0.214639	chr6:39320088	G	A	0.164199	11475	2282	9193	0.96[0.88-1.05]	0.398051	chr6:39320088	G	A	0.164897
rs6935668	chr6:47626685	C	T	0.3185	15346	5414	9932	0.99[0.97-1]	0.0374171	chr6:47626685	C	T	0.3168	12449	2517	9932	0.98[0.97-0.99]	8.7333e-05	chr6:47626685	C	T	0.3238	12120	2188	9932	1[0.99-1.01]	0.807175	chr6:47626685	T	C	0.681341	20075	4015	16060	1.01[0.96-1.07]	0.594602	chr6:47626685	T	C	0.682013	11475	2282	9193	1.04[0.97-1.11]	0.277838	chr6:47626685	T	C	0.680563
rs9354002	chr6:93947307	C	T	0.2389	15338	5408	9930	0.98[0.97-0.99]	0.00351211	chr6:93947307	C	T	0.2387	12446	2516	9930	0.97[0.96-0.99]	2.90075e-05	chr6:93947307	C	T	0.242	12114	2184	9930	0.99[0.98-1]	0.171243	chr6:93947307	C	T	0.237634	20075	4015	16060	0.99[0.94-1.05]	0.832249	chr6:93947307	C	T	0.236427	11475	2282	9193	1.01[0.94-1.09]	0.706233	chr6:93947307	C	T	0.235468
rs6932373	chr6:121790990	A	G	0.3796	15351	5414	9937	0.98[0.97-0.99]	0.00215595	chr6:121790990	A	G	0.3844	12454	2517	9937	0.99[0.98-1]	0.235272	chr6:121790990	A	G	0.3803	12125	2188	9937	0.98[0.97-0.99]	5.66363e-05	chr6:121790990	G	A	0.624596	20075	4015	16060	0.96[0.91-1.01]	0.117685	chr6:121790990	G	A	0.627973	11475	2282	9193	0.98[0.92-1.05]	0.655058	chr6:121790990	G	A	0.625422
rs6570098	chr6:137071655	A	G	0.4827	15348	5411	9937	0.98[0.97-1]	0.00657646	chr6:137071655	A	G	0.482	12452	2515	9937	0.98[0.97-0.99]	6.92685e-05	chr6:137071655	A	G	0.4874	12125	2188	9937	1[0.98-1.01]	0.373755	chr6:137071655	A	G	0.489322	20075	4015	16060	0.99[0.94-1.04]	0.58027	chr6:137071655	A	G	0.492478	11475	2282	9193	0.95[0.89-1.02]	0.131446	chr6:137071655	A	G	0.494378
rs1893895	chr6:162440687	T	C	0.1739	15352	5413	9939	1.03[1.01-1.04]	0.000506322	chr6:162440687	T	C	0.1696	12455	2516	9939	1.01[1-1.03]	0.0931634	chr6:162440687	T	C	0.1725	12127	2188	9939	1.03[1.01-1.04]	8.17453e-05	chr6:162440687	T	C	0.1747	20075	4015	16060	1.04[0.98-1.11]	0.205261	chr6:162440687	T	C	0.17327	11475	2282	9193	1.04[0.95-1.13]	0.402598	chr6:162440687	T	C	0.173846
rs35960711	chr7:29980471	T	C	0.04244	15350	5414	9936	1.04[1.02-1.07]	0.00183379	chr7:29980471	T	C	0.04212	12453	2517	9936	1.05[1.02-1.08]	9.71234e-05	chr7:29980471	T	C	0.04017	12124	2188	9936	1.01[0.98-1.03]	0.524502	chr7:29980471	T	C	0.0423661	20075	4015	16060	1.02[0.9-1.15]	0.804371	chr7:29980471	T	C	0.0434423	11475	2282	9193	1.1[0.94-1.28]	0.232801	chr7:29980471	T	C	0.0422658
rs2976921	chr8:8266397	C	A	0.3005	15352	5414	9938	0.97[0.96-0.99]	0.000520947	chr8:8266397	C	A	0.2998	12455	2517	9938	0.97[0.96-0.98]	1.80623e-05	chr8:8266397	C	A	0.3031	12126	2188	9938	1[0.98-1.01]	0.778699	chr8:8266397	C	A	0.301657	20075	4015	16060	1.01[0.96-1.07]	0.603378	chr8:8266397	C	A	0.305069	11475	2282	9193	1.03[0.96-1.1]	0.450912	chr8:8266397	C	A	0.303229
rs7004322	chr8:8761295	G	A	0.3875	15350	5414	9936	0.99[0.98-1]	0.0530235	chr8:8761295	G	A	0.3858	12453	2517	9936	0.98[0.97-0.99]	9.34647e-05	chr8:8761295	G	A	0.3936	12124	2188	9936	1.01[0.99-1.02]	0.309021	chr8:8761295	G	A	0.386482	20075	4015	16060	1[0.95-1.05]	0.944595	chr8:8761295	G	A	0.389634	11475	2282	9193	1.02[0.95-1.09]	0.623934	chr8:8761295	G	A	0.386867
rs10097305	chr8:8764824	A	G	0.1545	15352	5413	9939	0.97[0.96-0.99]	0.000262871	chr8:8764824	A	G	0.1548	12455	2516	9939	0.97[0.95-0.98]	8.37172e-06	chr8:8764824	A	G	0.1587	12127	2188	9939	0.99[0.98-1.01]	0.295507	chr8:8764824	A	G	0.15626	20075	4015	16060	0.98[0.92-1.05]	0.649536	chr8:8764824	A	G	0.156686	11475	2282	9193	1.01[0.92-1.1]	0.874521	chr8:8764824	A	G	0.155309
rs2956305	chr8:66008289	C	A	0.4587	15352	5414	9938	0.99[0.98-1]	0.0562161	chr8:66008289	C	A	0.4564	12455	2517	9938	0.98[0.97-0.99]	7.38731e-05	chr8:66008289	C	A	0.4643	12126	2188	9938	1[0.99-1.01]	0.397347	chr8:66008289	C	A	0.462954	20075	4015	16060	0.98[0.94-1.03]	0.519134	chr8:66008289	C	A	0.460633	11475	2282	9193	0.99[0.93-1.06]	0.81455	chr8:66008289	C	A	0.460769
rs77358867	chr8:120638927	T	C	0.007882	15352	5414	9938	1.13[1.06-1.2]	6.9752e-05	chr8:120638927	T	C	0.007387	12455	2517	9938	1.13[1.06-1.19]	4.75644e-05	chr8:120638927	T	C	0.006968	12126	2188	9938	1.08[1.02-1.14]	0.00944151	chr8:120638927	T	C	0.00703684	20075	4015	16060	1.11[0.82-1.49]	0.496997	chr8:120638927	T	C	0.00686867	11475	2282	9193	1.13[0.76-1.68]	0.557637	chr8:120638927	T	C	0.00686959
rs10116772	chr9:4290541	A	C	0.3996	15346	5410	9936	0.97[0.96-0.98]	3.28983e-06	chr9:4290541	A	C	0.4044	12452	2516	9936	0.98[0.97-0.99]	0.00179018	chr9:4290541	A	C	0.4043	12121	2185	9936	0.98[0.97-0.99]	0.00027375	chr9:4290541	A	C	0.398715	20075	4015	16060	0.97[0.92-1.02]	0.186415	chr9:4290541	A	C	0.399743	11475	2282	9193	0.98[0.92-1.05]	0.514964	chr9:4290541	A	C	0.39804
rs201889514	chr9:13219751	G	C	0.0004235	15350	5414	9936	1.56[1.21-2.01]	0.000577921	chr9:13219751	G	C	0.0001606	12453	2517	9936	1.33[0.91-1.97]	0.14419	chr9:13219751	G	C	0.0004124	12124	2188	9936	1.79[1.42-2.26]	1.0918e-06
rs4436218	chr9:18323073	A	G	0.4755	15352	5413	9939	0.98[0.97-0.99]	0.00141929	chr9:18323073	A	G	0.4764	12455	2516	9939	0.98[0.97-0.99]	6.73929e-05	chr9:18323073	A	G	0.4812	12127	2188	9939	0.99[0.98-1]	0.274456	chr9:18323073	A	G	0.479784	20075	4015	16060	1.01[0.96-1.06]	0.652347	chr9:18323073	A	G	0.479772	11475	2282	9193	1.02[0.96-1.09]	0.505871	chr9:18323073	A	G	0.47927
rs16933690	chr9:119339463	A	G	0.1413	15349	5411	9938	0.97[0.96-0.99]	0.00138252	chr9:119339463	A	G	0.1413	12453	2515	9938	0.97[0.96-0.98]	3.98466e-05	chr9:119339463	A	G	0.1461	12125	2187	9938	1[0.98-1.01]	0.809636	chr9:119339463	A	G	0.143985	20075	4015	16060	1[0.93-1.07]	0.966842	chr9:119339463	A	G	0.144836	11475	2282	9193	0.92[0.83-1.01]	0.0622575	chr9:119339463	A	G	0.147538
rs140970422	chr10:17024509	A	G	0.0003258	15349	5413	9936	1.43[1.07-1.9]	0.0155615	chr10:17024509	A	G	0.0001606	12452	2516	9936	1.08[0.73-1.59]	0.693817	chr10:17024509	A	G	0.0003712	12124	2188	9936	1.66[1.3-2.12]	6.12031e-05
rs1247098	chr10:30041106	T	C	0.2082	15345	5411	9934	1.02[1.01-1.04]	0.000592332	chr10:30041106	T	C	0.2076	12449	2515	9934	1.03[1.01-1.04]	4.19098e-05	chr10:30041106	T	C	0.2044	12122	2188	9934	1.01[1-1.02]	0.0594808	chr10:30041106	C	T	0.790884	20075	4015	16060	1.01[0.95-1.08]	0.701326	chr10:30041106	C	T	0.79451	11475	2282	9193	1[0.92-1.08]	0.929192	chr10:30041106	C	T	0.794248
rs10824101	chr10:75947438	C	T	0.1315	15352	5413	9939	0.98[0.97-1]	0.0410809	chr10:75947438	C	T	0.1347	12456	2517	9939	1[0.98-1.01]	0.809138	chr10:75947438	C	T	0.1303	12127	2188	9939	0.97[0.96-0.98]	4.5268e-05	chr10:75947438	C	T	0.127696	20075	4015	16060	1.01[0.93-1.08]	0.879275	chr10:75947438	C	T	0.127172	11475	2282	9193	1.05[0.95-1.15]	0.360767	chr10:75947438	C	T	0.125628
rs11186642	chr10:93403068	T	G	0.1156	15353	5414	9939	0.97[0.95-0.99]	0.000700955	chr10:93403068	T	G	0.1159	12456	2517	9939	0.97[0.95-0.98]	9.8874e-05	chr10:93403068	T	G	0.119	12127	2188	9939	0.99[0.98-1.01]	0.293548	chr10:93403068	T	G	0.120653	20075	4015	16060	0.99[0.92-1.07]	0.823075	chr10:93403068	T	G	0.120329	11475	2282	9193	0.97[0.88-1.07]	0.522252	chr10:93403068	T	G	0.120795
rs200007562	chr10:95121311	T	C	0.0004559	15353	5414	9939	1.49[1.17-1.91]	0.00128754	chr10:95121311	T	C	0.0002408	12456	2517	9939	1.34[0.98-1.84]	0.070651	chr10:95121311	T	C	0.0004535	12127	2188	9939	1.71[1.37-2.14]	2.78544e-06
rs581533	chr10:105933138	C	T	0.3311	15351	5412	9939	1.03[1.02-1.04]	9.89718e-06	chr10:105933138	C	T	0.327	12456	2517	9939	1.02[1.01-1.03]	0.000880002	chr10:105933138	C	T	0.3266	12125	2186	9939	1.02[1.01-1.03]	0.00163947	chr10:105933138	C	T	0.327208	20075	4015	16060	1.03[0.98-1.09]	0.270513	chr10:105933138	C	T	0.32702	11475	2282	9193	1.02[0.95-1.1]	0.556474	chr10:105933138	C	T	0.327031
rs642743	chr10:105933417	A	C	0.4018	15352	5414	9938	1.02[1.01-1.04]	6.77893e-05	chr10:105933417	A	C	0.3971	12455	2517	9938	1.01[1-1.03]	0.0113157	chr10:105933417	A	C	0.3973	12126	2188	9938	1.01[1-1.02]	0.0092741	chr10:105933417	A	C	0.402239	20075	4015	16060	1[0.95-1.05]	0.974503	chr10:105933417	A	C	0.401827	11475	2282	9193	0.98[0.91-1.04]	0.48005	chr10:105933417	A	C	0.402782
rs1038934	chr11:25753430	T	C	0.2165	15347	5411	9936	1.02[1-1.03]	0.0133192	chr11:25753430	T	C	0.2133	12452	2516	9936	1.01[0.99-1.02]	0.377259	chr11:25753430	T	C	0.217	12122	2186	9936	1.02[1.01-1.04]	8.13903e-05	chr11:25753430	C	T	0.780545	20075	4015	16060	0.98[0.92-1.04]	0.52788	chr11:25753430	C	T	0.777706	11475	2282	9193	1.03[0.95-1.11]	0.492711	chr11:25753430	C	T	0.776525
rs6591595	chr11:60291413	C	T	0.117	15345	5410	9935	1.04[1.02-1.05]	4.53395e-05	chr11:60291413	C	T	0.1137	12451	2516	9935	1.02[1-1.04]	0.0189166	chr11:60291413	C	T	0.1149	12120	2185	9935	1.03[1.01-1.05]	0.000279867	chr11:60291413	T	C	0.878804	20075	4015	16060	1.02[0.95-1.1]	0.542264	chr11:60291413	T	C	0.878431	11475	2282	9193	1.01[0.91-1.11]	0.892919	chr11:60291413	T	C	0.878519
rs2847212	chr11:60335964	C	T	0.1216	15346	5411	9935	1.04[1.02-1.06]	6.46323e-06	chr11:60335964	C	T	0.1182	12450	2515	9935	1.02[1.01-1.04]	0.00538789	chr11:60335964	C	T	0.1192	12122	2187	9935	1.03[1.02-1.05]	4.61742e-05	chr11:60335964	T	C	0.874485	20075	4015	16060	1[0.93-1.08]	0.98169	chr11:60335964	T	C	0.873447	11475	2282	9193	0.98[0.89-1.08]	0.653324	chr11:60335964	T	C	0.873728
rs2510389	chr11:68408004	T	C	0.1087	15350	5413	9937	0.98[0.96-1]	0.0126336	chr11:68408004	T	C	0.1116	12454	2517	9937	1[0.98-1.01]	0.734314	chr11:68408004	T	C	0.1079	12125	2188	9937	0.97[0.95-0.98]	2.61481e-05	chr11:68408004	T	C	0.108733	20075	4015	16060	1.01[0.93-1.09]	0.81005	chr11:68408004	T	C	0.108314	11475	2282	9193	0.91[0.82-1.01]	0.0793803	chr11:68408004	T	C	0.110474
rs641902	chr11:87610338	A	G	0.3224	15346	5413	9933	0.98[0.97-0.99]	0.00344835	chr11:87610338	A	G	0.3269	12449	2516	9933	0.99[0.98-1.01]	0.336093	chr11:87610338	A	G	0.3226	12121	2188	9933	0.98[0.97-0.99]	5.98493e-05	chr11:87610338	G	A	0.674994	20075	4015	16060	0.99[0.94-1.04]	0.581248	chr11:87610338	G	A	0.676383	11475	2282	9193	0.99[0.92-1.06]	0.712248	chr11:87610338	G	A	0.675076
rs115251509	chr11:108057226	T	C	0.0002605	15353	5414	9939	1.73[1.25-2.39]	0.00085584	chr11:108057226	T	C	0.0001204	12456	2517	9939	1.61[1.03-2.52]	0.0362809	chr11:108057226	T	C	0.0002474	12127	2188	9939	1.98[1.46-2.68]	9.73467e-06
rs10771313	chr12:27143016	C	T	0.4987	15343	5406	9937	1.02[1.01-1.03]	0.000152023	chr12:27143016	C	T	0.4963	12451	2514	9937	1.02[1.01-1.03]	8.1101e-05	chr12:27143016	C	T	0.4933	12120	2183	9937	1.01[1-1.02]	0.0700207	chr12:27143016	C	T	0.49985	20075	4015	16060	1.03[0.98-1.08]	0.249899	chr12:27143016	C	T	0.499954	11475	2282	9193	1.04[0.97-1.11]	0.280805	chr12:27143016	C	T	0.499605
rs11049193	chr12:27995047	T	G	0.2545	15344	5413	9931	1.02[1.01-1.04]	0.000219541	chr12:27995047	T	G	0.2537	12448	2517	9931	1.03[1.02-1.04]	6.01461e-06	chr12:27995047	T	G	0.2491	12119	2188	9931	1.01[1-1.02]	0.185295	chr12:27995047	T	G	0.25317	20075	4015	16060	1.05[0.99-1.11]	0.126946	chr12:27995047	T	G	0.25847	11475	2282	9193	1.12[1.04-1.2]	0.00379175	chr12:27995047	T	G	0.252111
rs258394	chr12:28004886	C	T	0.2091	15340	5409	9931	1.02[1.01-1.03]	0.00599272	chr12:28004886	C	T	0.21	12447	2516	9931	1.03[1.02-1.04]	5.45617e-06	chr12:28004886	C	T	0.2045	12116	2185	9931	1[0.99-1.02]	0.584602	chr12:28004886	C	T	0.203948	20075	4015	16060	1.05[0.99-1.11]	0.133846	chr12:28004886	C	T	0.206632	11475	2282	9193	1.08[1-1.17]	0.0560006	chr12:28004886	C	T	0.203989
rs10843013	chr12:28025196	C	A	0.2092	15350	5411	9939	1.02[1.01-1.04]	0.00208294	chr12:28025196	C	A	0.2103	12456	2517	9939	1.03[1.02-1.05]	2.88909e-07	chr12:28025196	C	A	0.2041	12124	2185	9939	1[0.99-1.01]	0.680849	chr12:28025196	C	A	0.206401	20075	4015	16060	1.05[0.99-1.12]	0.100694	chr12:28025196	C	A	0.210022	11475	2282	9193	1.12[1.04-1.22]	0.00368879	chr12:28025196	C	A	0.204924
rs141005789	chr12:52793771	A	G	0.001238	15351	5413	9938	1.2[1.03-1.39]	0.0188998	chr12:52793771	A	G	0.0008431	12454	2516	9938	0.95[0.8-1.13]	0.579739	chr12:52793771	A	G	0.001361	12126	2188	9938	1.31[1.15-1.5]	3.80155e-05	chr12:52793771	A	G	0.00154573	20075	4015	16060	0.55[0.24-1.24]	0.118696	chr12:52793771	A	G	0.00167275	11475	2282	9193	0.26[0.06-1.08]	0.0216932	chr12:52793771	A	G	0.0018195
rs342153	chr12:63158162	T	C	0.3651	15353	5414	9939	1.01[1-1.03]	0.0166921	chr12:63158162	T	C	0.3601	12456	2517	9939	1[0.99-1.01]	0.918743	chr12:63158162	T	C	0.3665	12127	2188	9939	1.02[1.01-1.03]	1.03496e-05	chr12:63158162	T	C	0.367818	20075	4015	16060	1.04[0.99-1.09]	0.153769	chr12:63158162	T	C	0.368592	11475	2282	9193	1.02[0.95-1.09]	0.610586	chr12:63158162	T	C	0.368993
rs143089752	chr12:101493469	G	A	0.0009445	15352	5413	9939	1.39[1.17-1.65]	0.000135839	chr12:101493469	G	A	0.0006824	12456	2517	9939	1.34[1.11-1.62]	0.0022371	chr12:101493469	G	A	0.0007422	12126	2187	9939	1.44[1.21-1.72]	4.06471e-05	chr12:101493469	G	A	0.00168277	20075	4015	16060	1.4[0.69-2.85]	0.365994	chr12:101493469	G	A	0.00152812	11475	2282	9193	0.83[0.26-2.65]	0.751598	chr12:101493469	G	A	0.00174306
rs11843068	chr13:99621570	G	A	0.2831	15349	5414	9935	0.98[0.97-0.99]	0.000326348	chr13:99621570	G	A	0.2846	12452	2517	9935	0.98[0.97-0.99]	8.35184e-05	chr13:99621570	G	A	0.2878	12123	2188	9935	0.99[0.98-1]	0.0372191	chr13:99621570	G	A	0.278013	20075	4015	16060	1.04[0.99-1.1]	0.140813	chr13:99621570	G	A	0.277046	11475	2282	9193	1.04[0.97-1.12]	0.276038	chr13:99621570	G	A	0.277182
rs1741233	chr14:95360139	A	G	0.2003	15353	5414	9939	1.02[1-1.03]	0.00958885	chr14:95360139	A	G	0.197	12456	2517	9939	1[0.99-1.02]	0.542103	chr14:95360139	A	G	0.2012	12127	2188	9939	1.03[1.01-1.04]	5.99973e-05	chr14:95360139	A	G	0.196712	20075	4015	16060	1[0.94-1.07]	0.892565	chr14:95360139	A	G	0.19451	11475	2282	9193	0.96[0.89-1.05]	0.36813	chr14:95360139	A	G	0.196906
rs150893437	chr14:102900938	T	C	0.0004235	15348	5411	9937	1.37[1.06-1.76]	0.0155416	chr14:102900938	T	C	0.0002008	12451	2514	9937	0.99[0.7-1.4]	0.951802	chr14:102900938	T	C	0.0004536	12125	2188	9937	1.56[1.25-1.95]	9.29108e-05
rs138063419	chr15:28375414	T	A	0.0007166	15350	5413	9937	1.44[1.19-1.75]	0.000206416	chr15:28375414	T	A	0.0006424	12454	2517	9937	1.56[1.29-1.89]	6.74363e-06	chr15:28375414	T	A	0.0003712	12124	2187	9937	1.18[0.92-1.5]	0.198845	chr15:28375414	T	A	0.00132403	20075	4015	16060	1.24[0.54-2.88]	0.621832	chr15:28375414	T	A	0.00131935	11475	2282	9193	1.46[0.49-4.31]	0.519203	chr15:28375414	T	A	0.0012302
rs139852972	chr15:59189414	A	C	0.003257	15353	5414	9939	1.17[1.07-1.28]	0.000793044	chr15:59189414	A	C	0.003251	12456	2517	9939	1.2[1.1-1.31]	2.47626e-05	chr15:59189414	A	C	0.002598	12127	2188	9939	1.05[0.96-1.15]	0.314721	chr15:59189414	A	C	0.0027331	20075	4015	16060	1.13[0.69-1.85]	0.620139	chr15:59189414	A	C	0.00307316	11475	2282	9193	1.32[0.73-2.38]	0.365031	chr15:59189414	A	C	0.00279613
rs143249432	chr15:59487752	C	G	0.003322	15352	5414	9938	1.15[1.05-1.26]	0.00256204	chr15:59487752	C	G	0.003372	12455	2517	9938	1.2[1.1-1.3]	3.85431e-05	chr15:59487752	C	G	0.002721	12126	2188	9938	1.05[0.96-1.15]	0.295756	chr15:59487752	C	G	0.00274949	20075	4015	16060	0.83[0.48-1.42]	0.477071	chr15:59487752	C	G	0.00287553	11475	2282	9193	0.94[0.48-1.87]	0.868517	chr15:59487752	C	G	0.00273592
rs34925488	chr15:63414116	A	G	0.0002931	15353	5414	9939	1.53[1.13-2.08]	0.00580619	chr15:63414116	A	G	0.0001204	12456	2517	9939	1.1[0.7-1.72]	0.680456	chr15:63414116	A	G	0.0003298	12127	2188	9939	1.79[1.38-2.33]	1.34966e-05
rs12709169	chr16:7106360	C	A	0.4205	15338	5409	9929	1.02[1.01-1.03]	0.00221531	chr16:7106360	C	A	0.4147	12444	2515	9929	1[0.99-1.01]	0.560936	chr16:7106360	C	A	0.4201	12117	2188	9929	1.02[1.01-1.03]	5.5803e-05	chr16:7106360	A	C	0.583147	20075	4015	16060	1.05[1-1.1]	0.0523536	chr16:7106360	A	C	0.583705	11475	2282	9193	1.05[0.99-1.13]	0.122191	chr16:7106360	A	C	0.58313
rs146782316	chr16:24801809	A	G	0.0005862	15353	5414	9939	1.67[1.34-2.07]	3.09152e-06	chr16:24801809	A	G	0.0004014	12456	2517	9939	1.67[1.31-2.13]	3.85297e-05	chr16:24801809	A	G	0.0003711	12127	2188	9939	1.64[1.28-2.11]	7.96118e-05
rs1510158	chr16:61929073	A	G	0.1578	15353	5414	9939	1.02[1-1.03]	0.0332346	chr16:61929073	A	G	0.154	12456	2517	9939	1[0.98-1.01]	0.815042	chr16:61929073	A	G	0.1589	12127	2188	9939	1.03[1.02-1.04]	2.89254e-05	chr16:61929073	A	G	0.157667	20075	4015	16060	1.04[0.97-1.11]	0.258397	chr16:61929073	A	G	0.158702	11475	2282	9193	1.05[0.96-1.15]	0.290798	chr16:61929073	A	G	0.157521
rs139062506	chr17:1551732	A	G	0.0007816	15353	5414	9939	1.36[1.13-1.63]	0.00130558	chr17:1551732	A	G	0.000562	12456	2517	9939	1.25[1.02-1.53]	0.0354435	chr17:1551732	A	G	0.0007009	12127	2188	9939	1.43[1.2-1.71]	9.3877e-05
rs200458673	chr17:45730207	G	A	0.0002932	15350	5413	9937	1.68[1.24-2.28]	0.000837659	chr17:45730207	G	A	0.0001606	12454	2517	9937	1.4[0.95-2.06]	0.0877303	chr17:45730207	G	A	0.0002887	12124	2187	9937	1.84[1.39-2.43]	2.25666e-05
rs9890347	chr17:63324851	T	C	0.0003583	15349	5411	9938	1.54[1.17-2.02]	0.00219874	chr17:63324851	T	C	0.0002007	12454	2516	9938	1.51[1.07-2.14]	0.0189363	chr17:63324851	T	C	0.0003299	12124	2186	9938	1.73[1.33-2.25]	4.44327e-05
rs8074150	chr17:65768543	T	C	0.4609	15352	5414	9938	1.02[1.01-1.04]	1.21397e-05	chr17:65768543	T	C	0.4562	12455	2517	9938	1.01[1-1.03]	0.00392429	chr17:65768543	T	C	0.4569	12126	2188	9938	1.02[1.01-1.03]	0.000132867	chr17:65768543	T	C	0.46411	20075	4015	16060	0.98[0.93-1.03]	0.33295	chr17:65768543	T	C	0.467451	11475	2282	9193	0.97[0.91-1.03]	0.329172	chr17:65768543	T	C	0.467015
rs12953819	chr18:1051047	A	C	0.1224	15353	5414	9939	1.03[1.02-1.05]	8.59899e-05	chr18:1051047	A	C	0.1206	12456	2517	9939	1.03[1.01-1.05]	0.000182791	chr18:1051047	A	C	0.1192	12127	2188	9939	1.02[1.01-1.04]	0.00719821	chr18:1051047	A	C	0.118441	20075	4015	16060	1.01[0.94-1.09]	0.743156	chr18:1051047	A	C	0.119572	11475	2282	9193	0.98[0.89-1.09]	0.697655	chr18:1051047	A	C	0.120746
rs789029	chr18:1053252	C	T	0.1742	15338	5410	9928	1.03[1.01-1.04]	8.88464e-05	chr18:1053252	C	T	0.1733	12444	2516	9928	1.03[1.02-1.04]	5.19786e-06	chr18:1053252	C	T	0.17	12114	2186	9928	1.01[1-1.03]	0.0519539	chr18:1053252	C	T	0.170234	20075	4015	16060	0.98[0.92-1.05]	0.603074	chr18:1053252	C	T	0.171058	11475	2282	9193	0.97[0.89-1.06]	0.535446	chr18:1053252	C	T	0.171473
rs200544551	chr18:12464867	C	T	0.0006188	15353	5414	9939	1.39[1.13-1.71]	0.00219087	chr18:12464867	C	T	0.0006021	12456	2517	9939	1.49[1.22-1.82]	9.69835e-05	chr18:12464867	C	T	0.0004123	12127	2188	9939	1.25[0.98-1.58]	0.0670124
rs1590202	chr20:2162656	C	T	0.3063	15353	5414	9939	1.02[1.01-1.03]	0.000740245	chr20:2162656	C	T	0.306	12456	2517	9939	1.02[1.01-1.03]	5.4882e-05	chr20:2162656	C	T	0.3011	12127	2188	9939	1.01[1-1.02]	0.16482	chr20:2162656	T	C	0.693855	20075	4015	16060	0.99[0.94-1.05]	0.842191	chr20:2162656	T	C	0.691989	11475	2282	9193	0.97[0.9-1.04]	0.321532	chr20:2162656	T	C	0.695171
rs6125102	chr20:46386635	A	G	0.1693	15350	5414	9936	1.03[1.01-1.04]	7.04471e-05	chr20:46386635	A	G	0.1663	12453	2517	9936	1.02[1-1.03]	0.00734748	chr20:46386635	A	G	0.1657	12124	2188	9936	1.02[1-1.03]	0.0139147	chr20:46386635	A	G	0.16609	20075	4015	16060	0.98[0.92-1.05]	0.537215	chr20:46386635	A	G	0.169169	11475	2282	9193	0.99[0.91-1.08]	0.781605	chr20:46386635	A	G	0.16722
rs150196385	chr20:60902022	T	C	0.0002931	15352	5413	9939	1.73[1.28-2.35]	0.000376782	chr20:60902022	T	C	0.0002409	12455	2516	9939	1.91[1.39-2.62]	6.0558e-05	chr20:60902022	T	C	0.0001237	12127	2188	9939	1.63[1.06-2.51]	0.0246062
rs9975358	chr21:34579572	A	G	0.1545	15353	5414	9939	1.02[1-1.03]	0.0369068	chr21:34579572	A	G	0.1505	12456	2517	9939	0.99[0.98-1.01]	0.398827	chr21:34579572	A	G	0.1559	12127	2188	9939	1.03[1.01-1.04]	5.98662e-05	chr21:34579572	A	G	0.152855	20075	4015	16060	1.01[0.94-1.08]	0.759149	chr21:34579572	A	G	0.155565	11475	2282	9193	1.01[0.92-1.1]	0.84891	chr21:34579572	A	G	0.154753
rs2836627	chr21:40059292	T	C	0.2655	15353	5414	9939	1.02[1.01-1.03]	0.00166448	chr21:40059292	T	C	0.2645	12456	2517	9939	1.03[1.01-1.04]	1.6694e-05	chr21:40059292	T	C	0.2611	12127	2188	9939	1.01[1-1.02]	0.156029	chr21:40059292	T	C	0.265447	20075	4015	16060	1.01[0.95-1.06]	0.811516	chr21:40059292	T	C	0.264428	11475	2282	9193	1.06[0.98-1.14]	0.13913	chr21:40059292	T	C	0.261732
rs149988961	chr22:42422869	T	G	0.0003257	15353	5414	9939	1.59[1.19-2.13]	0.00156781	chr22:42422869	T	G	0.0001606	12456	2517	9939	1.32[0.9-1.95]	0.153597	chr22:42422869	T	G	0.0003298	12127	2188	9939	1.81[1.39-2.35]	9.9231e-06
[truncated: 50 more columns]
