# Supplementary material for: A novel variant in GLIS3 is associated with osteoarthritis
Source: Ann Rheum Dis. 2018 Feb 7;77(4):620–3. doi: 10.1136/annrheumdis-2017-211848 (PMC5890630; doi:10.1136/annrheumdis-2017-211848)
Supplement: Supplementary file 13 [file annrheumdis-2017-211848supp013.xlsx]

## Sheet: Sheet1
Table S7. Replication of established OA loci in UKBiobank OA phenotypes
TJR, total joint replacement
Index SNP	Nearest gene(s)	Ethnic group discovery	Joint site discovery	Sex discovery	Self reported OA p-value	Hospital diagnosed OA p-value	Hospital diagnosed hip OA p-value	Hospital diagnosed knee OA p-value	Hospital diagnosed hip and/or knee OA p-value	Operation hip and/or knee p-value	Operation hip p-value	Operation knee p-value
rs143383a	GDF5	Asian and European	knee and hip	both	5.1x10-9	3.5x10-7	0.052	1.46x10-5	1.23x10-6	0.000574958	0.138111	0.000392192
rs11842874	MCF2L	European	knee and hip	both	0.559	0.402	0.289	0.415	0.994	0.382878	0.463558	0.476361
rs8044769b,c	FTO	European	knee and hip	females	N/A	N/A	0.651	0.025	0.038	0.42047	0.916942	0.39286
rs10948172b	SUPT3H; CDC5L;	European	knee and hip	males	0.045	0.284	0.178	0.054	0.051	0.000680149	0.0908015	0.00362202
rs12901071	SMAD3	European	knee and hip/BMD	both	0.07	0.002	0.009	0.235	0.023	0.0269723	0.0353393	0.253617
rs6976	GLT8D1	European	knee and hip TJR	both	0.626	0.326	0.0006	0.342	0.04	0.00520972	3.96x10-5	0.107489
rs7639618	DVWA	Asian	knee	both	0.529	0.736	0.527	0.777	0.81	0.586895	0.889091	0.618266
rs7775228	HLA-DQB1	Asian	knee	both	0.225	0.878	0.256	0.595	0.966	0.877499	0.160918	0.892049
rs10947262	BTNL2	Asian and European	knee	both	0.082	0.822	0.763	0.171	0.655	0.812081	0.625918	0.126697
rs4730250	DUS4L	European	knee	both	0.837	0.186	0.76	0.17	0.239	0.122992	0.437413	0.456762
rs12107036b	TP63	European	Knee TJR	females	0.588	0.441	0.773	0.572	0.492	0.392386	0.889207	0.51342
rs3815148b	COG5	European	knee and hand	both	0.967	0.105	0.603	0.03	0.067	0.0902855	0.753511	0.228792
rs12982744	DOT1L	European	hip	males	0.259	0.698	0.341	0.409	0.64	0.637043	0.522035	0.617776
rs6094710	NCOA3	European	hip	both	N/A	N/A	0.315	0.665	N/A	0.223924	0.453973	0.0738043
rs9350591	FILIP1; SENP6	European	hip	both	0.428	0.019	0.006	0.658	0.062	0.0446024	0.00090909	0.313065
rs10492367	KLHDC5; PTHLH	European	hip	both	0.773	0.337	0.001	0.877	0.048	0.0535367	0.00646711	0.754281
rs4836732	ASTN2	European	hip TJR	females	0.517	0.952	0.137	0.656	0.664	0.438383	0.0885445	0.715437
rs835487	CHST11	European	hip TJR	both	0.068	0.025	0.137	0.157	0.063	0.0478375	0.0393997	0.270379
aSNP studied separately in Asian and European populations.
bSNP just below genome-wide significance.
cThis signal was attenuated after Body Mass Index adjustment.
