# Supplementary material for: A novel variant in GLIS3 is associated with osteoarthritis
Source: Ann Rheum Dis. 2018 Feb 7;77(4):620–3. doi: 10.1136/annrheumdis-2017-211848 (PMC5890630; doi:10.1136/annrheumdis-2017-211848)
Supplement: Supplementary file 15 [file annrheumdis-2017-211848supp015.xlsx]

## Sheet: Sheet1
Table S9. Summary statistics of the association of rs10116772 with height and with BMI in large-scale meta-analysis from GIANT (All ancestry) and UK10K (European ancestry) studies.
Study	Reference	Trait	N	p-value	Beta [SE]
GIANT	21	Height	197704	0.58	0.0018 [0.0034]
GIANT	22	BMI	274408	0.2997	0.0034 [0.0033]
UK10K	23	Height	51309	0.005654	0.0178 [0.0064]
UK10K	23	BMI	51014	0.932	-0.0006 [0.0065]
